## Evolutionary origins of epidemic potential among human RNA viruses

Lu Lu<sup>1\*</sup>, Liam Brierley<sup>2</sup>, Gail Robertson<sup>3</sup>, Feifei Zhang<sup>1</sup>, Samantha Lycett<sup>4</sup>, Donald Smith<sup>5</sup>, Margo Chase-Topping<sup>1,4</sup>, Peter Simmonds<sup>6</sup>, Mark Woolhouse<sup>1</sup>

<sup>1</sup>Usher Institute of Population Health Sciences & Informatics, Ashworth Laboratories, Kings Buildings, University of Edinburgh, Charlotte Auerbach Road, Edinburgh EH9 3FL, UK

<sup>2</sup>Department of Biostatistics, Waterhouse Building, University of Liverpool, Brownlow Street, Liverpool L69 3GL

<sup>3</sup>School of Mathematics, James Clerk Maxwell Building, King's Buildings, University of Edinburgh, Edinburgh, Edinburgh EH9 3FD, UK

<sup>4</sup>Roslin Institute, University of Edinburgh, Easter Bush Campus, Midlothian EH25 9RG, UK

<sup>5</sup>Institute of Evolutionary Biology, Ashworth Laboratories, Kings Buildings, University of Edinburgh, Charlotte Auerbach Road, Edinburgh EH9 3FL, UK

<sup>6</sup>Nuffield Department of Medicine, University of Oxford, Peter Medawar Building, South Parks, Oxford, OX1 3SY, UK

\*Corresponding author: Email: [lu.lu@ed.ac.uk](mailto:lu.lu@ed.ac.uk)

## Abstract

To have epidemic potential, a pathogen must be able to spread in human populations, but of human-infective RNA viruses only a minority can do so. We investigated the evolution of human transmissibility through parallel analyses of 1755 virus genome sequences from 39 RNA virus genera. We identified 57 lineages containing human-transmissible species and estimated that at least 74% of these lineages have evolved directly from non-human viruses in other mammals or birds, a public health threat recently designated “Disease X”. Human-transmissible viruses rarely evolve from virus lineages that can infect but not transmit between humans. This result cautions against focussing surveillance and mitigation efforts narrowly on currently known human-infective virus lineages and supports calls for a better understanding of RNA virus diversity in non-human hosts.

## 1 Introduction

2 Ebolavirus in 2014-15 and SARS coronavirus in 2003 are examples of infectious disease  
3 epidemics resulting from the emergence of RNA viruses from non-human reservoirs<sup>1</sup>.  
4 However, the majority of spill-overs from non-human reservoirs involve viruses that do not  
5 spread in human populations (e.g., the strictly zoonotic orthohantaviruses and bat  
6 lyssaviruses)<sup>2</sup>. There have been various studies of ecological predictors of virus infectivity to  
7 humans (e.g. <sup>3,4</sup>) but less attention has been paid to transmissibility in human populations even  
8 though this trait is integral to epidemic potential<sup>5-7</sup>. Here, we aim to identify phylogenetic and  
9 ecological characteristics of RNA virus lineages that are associated with the evolution of  
10 human transmissibility.

11  
12 Members of over 200 non-reverse transcribing (non-RT) RNA virus species (i.e. excluding  
13 retroviruses) are known to infect humans<sup>8,9</sup>. Human-infective viruses are found in 20 of the 22  
14 currently recognised families of non-RT RNA viruses of mammals and/or birds (the exceptions  
15 being the *Arteriviridae* and *Birnaviridae*). Although members of only 82 human-infective non-  
16 RT RNA virus species (40%) are known to transmit within human populations (other than by  
17 vertical or iatrogenic routes)<sup>8</sup>, these too have broad taxonomic distributions, being found in 19  
18 families (the *Bornaviridae* having no human-transmissible species).

19  
20 New human RNA viruses are still discovered regularly<sup>8</sup> and it is likely that a large number of  
21 currently unknown RNA viruses are circulating in non-human mammals and birds, some of  
22 which may have the potential to infect and be transmitted by humans<sup>10-12</sup>. All known human  
23 RNA viruses form part of purely mammal or mammal/bird virus clades<sup>12</sup> and there is no  
24 evidence of human-infective RNA viruses emerging from other kinds of host<sup>6</sup>.

25  
26 Human transmissibility (here, broadly defined as spread directly from person to person or via  
27 an indirect route, such as environmental contamination or an arthropod vector) is a necessary  
28 but not sufficient condition for a virus to have epidemic potential. Pathogens that are  
29 transmissible but with a basic reproduction number ( $R_0$ ) less than 1 in humans (e.g. Lassa virus)  
30 are restricted to self-limiting outbreaks and their long-term persistence requires a non-human  
31 reservoir. Previous studies have addressed the ecology<sup>6</sup> and evolution<sup>13</sup> of the transition  
32 between  $R_0 < 1$  and  $R_0 > 1$ ; here, we focus on the evolution of human transmissibility, i.e.  $R_0 > 0$ .  
33 We categorised RNA viruses into three infectivity/transmissibility (IT) levels<sup>6</sup>: Level 1 (L1)  
34 viruses are infective to non-human mammals and/or birds but not to humans; L2 viruses are

35 human-infective but not human-transmissible; and L3/4 viruses are human-infective and  
36 transmissible (combining viruses with  $0 < R_0 < 1$  (L3) and those with  $R_0 > 1$  (L4)).

37

38 Here, we propose a conceptual model of RNA virus emergence where that latent capacities to  
39 infect and transmit between humans are traits inherent to some L1 virus lineages circulating in  
40 non-human reservoirs (Figure 1); this has been termed “fortuitous adaptation”<sup>14</sup>. This view  
41 emphasizes the role of virus genetic diversity within the reservoir, with humans acting as  
42 “sentinels”<sup>10</sup>, revealing the presence of L2 or L3/4 viruses through contact with the reservoir.  
43 New L3/4 viruses can emerge by any of three routes: i) directly from viruses in a non-human  
44 reservoir (L1) at a rate given by parameter  $a$ ; ii) step-wise via a strictly zoonotic (L2) phase in  
45 a non-human reservoir or, less probably, in infected humans at rates given by parameters  $b$  and  
46  $c$ ; or iii) diversification of human-transmissible (L3/4) virus lineages within humans or,  
47 possibly, a non-human reservoir. We note that human infectivity and transmissibility are  
48 products of convergent evolution, with their molecular and genetic determinants differing  
49 across virus taxa<sup>9</sup>, and that the rates of evolution of these traits represented by parameters  $a$ ,  $b$   
50 and  $c$  are likely to vary between lineages.

51

## 52 Results

53 For phylogenetic analysis we used polymerase protein sequences of human and non-human  
54 RNA viruses classified into 39 genera (see Supplementary Materials). We only considered  
55 genera containing human-infective virus species, noting that not all eligible genera had  
56 sufficient sequences available for analysis. We also excluded all retroviruses *a priori* and the  
57 *Influenza A virus* genus *a posteriori* from the main analysis (see Supplementary Materials) but,  
58 given their importance, we performed separate analyses of these taxa.

59

60 Of the 1755 polymerase gene sequences used in our main study, 737 were from L1 viruses,  
61 466 were from L2 viruses (90 from humans, 376 from non-human hosts) and 552 from L3/4  
62 viruses (400 from humans, 152 from non-human hosts). These included virus sequences from  
63 natural infections of all available mammal or bird hosts. A plot of the cumulative number of  
64 sequences from L1, L2 and L3/4 viruses in our data set over time (Figure S1), reveals the rapid  
65 recent increase in numbers of L1 virus sequences that makes our study feasible at this time.  
66 The sequences represent 79% and 81% respectively of L2 and L3/4 non-RT RNA virus species  
67 currently listed by the International Committee for the Taxonomy of Viruses (ICTV)<sup>9</sup>. Within

68 some virus species, we differentiated between recognised subtypes that differ in  
69 infectivity/transmissibility (IT) level (see Data File 4).

70

71 We estimated the phylogenies of the mammal/bird virus clade for each of the 39 non-RT RNA  
72 virus genera (Figure 2). We then used a Bayesian discrete trait approach (see Supplementary  
73 Materials) to estimate IT level for every node within those phylogenies. Our primary interest  
74 was tree topology; we did not attempt to date the nodes. The phylogenies indicated that for at  
75 least 22/39 genera containing human-infective viruses (L2 and/or L3/4), human infectivity is  
76 unlikely ( $P < 0.20$ ) to be an ancestral trait, and for at least 22/31 genera containing human-  
77 transmissible (L3/4) viruses, transmissibility is unlikely ( $P < 0.20$ ) to be an ancestral trait  
78 (Figures 3a, S2, Data File 1). In total, we identified 77 distinct lineages of human-infective (L2  
79 and/or L3/4) and 57 of human-transmissible (L3/4) viruses (Figure 2, Data File 1).

80

81 We found evidence of 86 transitions involving gain of human infectivity and 52 involving gain  
82 of human transmissibility within the 39 virus genera (Table S1, Figures 2, S3, Data File 2).  
83 Human infectivity and transmissibility are likely to have evolved more than once in 20 and 17  
84 genera respectively (Figure 3b). We note that we also found evidence of backward transitions:  
85 seven involving loss of human transmissibility and 11 involving loss of human infectivity (Data  
86 File 3). We compared our estimated numbers of transitions with outputs from both Markov  
87 jumps and a parsimony reconstruction method (see Supplementary Materials). These checks  
88 confirm that our estimates of the total numbers of transitions are well supported by the  
89 phylogenetic data, even though the precise location of a transition within a phylogeny could  
90 not always be estimated with high confidence.

91

92 One-third of the genera (13/39) have both L1 and L3/4 but no known, extant L2 viruses. Among  
93 genera containing L2 viruses, a L1-L2 transition was followed by a L2-L3/4 transition in just  
94 four virus lineages (from the genera *Phlebovirus*, *Orthonairovirus*, *Henipavirus* and  
95 *Orthohepevirus*). Overall, we estimate that direct evolution from L1 virus lineages is the most  
96 likely origin of 74% of the 57 L3/4 lineages, with just 17% from L2 virus lineages and 9%  
97 unknown (Figures 2, S3). Eight genera show species-level diversification within L3/4 lineages,  
98 potentially within human populations, but this accounts for only 21/70 (30%) of L3/4 RNA  
99 virus species in our data set (Figures 2, S3).

100

101 The relative frequencies of L1-L2, L1-L3/4 and L2-L3/4 transitions varied across genera,  
102 families and genome types (Figures 3b-d, Table S2). The odds of L1-L3/4 relative to L1-L2  
103 transitions were lower for (-)ssRNA versus (+)ssRNA or dsRNA (Figure 2d), for enveloped  
104 versus non-enveloped (Figure 3e) and for vector-borne versus non-vector-borne viruses (Figure  
105 3f) with unadjusted ORs=0.15, 0.23 and 0.23 respectively, all  $P<0.05$ . However, these traits  
106 are correlated and multivariable analysis suggested that the dominant effect was the low odds  
107 of L1-L3/4 transitions among (-)ssRNA viruses relative to dsRNA and (+)ssRNA viruses  
108 (Table 1). We note that L2-L3/4 transitions were highly over-represented (unadjusted  
109 OR=11.5,  $P<0.001$ ) among vector-borne viruses (Figure 3f), occurring in only three non-  
110 vector-borne virus genera (*Henipavirus*, *Metapneumovirus* and *Orthohepevirus*).

111  
112 L1-L2, L1-L3/4 and L2-L3/4 transitions had similar distributions of relative node depth (Table  
113 S3, Figure S4). There was no indication that L2 viruses tended to arise earlier in lineages than  
114 L3/4 viruses. Nor was there a consistent trend towards evolutionary recent (as measured by  
115 relative node depth) increases in the number of viruses entering human populations. We also  
116 estimated the instantaneous transition rates between IT level (see Supplementary Materials).  
117 The rates of L2-L3/4 transitions were not higher than the rates of L1-L3/4 transitions (Figure  
118 3g, Table S4). This implies that the distributions of values of parameters  $a$  and  $c$  in our  
119 conceptual model (Figure 1) are similar. The estimated rates were highly variable across virus  
120 taxa (Figures S5, S6) but this was not associated with genome type/enveloped or being vector  
121 borne (Table S4).

122  
123 In contrast to IT levels, host categories are not mutually exclusive traits of a virus  
124 species/subtype, and for some genera (e.g. *Ebolavirus*) it is likely that we are missing sequences  
125 from the reservoir host(s). Therefore, we did not attempt a discrete traits analysis for host range  
126 but compared the known non-human hosts for L2 and L3/4 viruses at the species/subtype and  
127 genus levels (see Supplementary Materials). At the species/subtype level human viruses also  
128 found in non-human primates were most likely to be L3/4 rather than L2; those also found in  
129 birds were least likely (Figure 4). At the genus level the pattern was similar (Spearman's rank  
130 correlation of coefficient estimates by host category = +0.89,  $P<0.01$ ) but the confidence  
131 intervals are wider due to the smaller sample sizes (Figure S7). These results are consistent  
132 with primates being disproportionately frequent ancestral hosts of L3/4 virus lineages, but there  
133 are too few virus sequences from wild primates available (74 in our data set) to test that  
134 hypothesis more formally through phylogenetic analysis.

135

136 In keeping with earlier work<sup>15</sup>, we used RNA-dependent RNA polymerase protein-based  
137 phylogenies in our main analysis. However, we tested the possibility that alternative  
138 phylogenies would generate different numbers and distributions of transitions between traits  
139 by constructing alternative trees based on surface protein sequences (Figure S8). We obtained  
140 results that differed minimally from our main analysis, most importantly that an estimated 71%  
141 of L3/4 lineages have L1 ancestors (see Data File 9).

142

143 We recognise that there will be significant gaps in our knowledge of mammal/bird non-RT  
144 RNA virus diversity: new species are routinely being identified<sup>8</sup> and virus genome sequences  
145 are accumulating rapidly (Figure S1). Our selection procedure resulted in a data set with only  
146 28% of virus sequences from human hosts, but it is still likely that the phylogenetic diversity  
147 of viruses from non-human hosts is greatly underestimated relative to that from humans<sup>3,14</sup>,  
148 noting that for many mammal/bird taxa no RNA viruses at all have yet been reported. There  
149 will also be gaps in our knowledge of IT level: some viruses originally classified as L1 have  
150 been subsequently found to be human infective; and some viruses originally classified as L2 have  
151 been subsequently found to be human transmissible as epidemiological data accumulates<sup>6</sup>. As  
152 new virus sequences are added and IT levels are assigned or (occasionally) re-assigned it is  
153 entirely possible that the estimated ancestors of some L3/4 viruses will change. However, we  
154 anticipate that the impact of such changes across the whole data set will be to strengthen our  
155 main conclusions. This is because we anticipate that far more L1 viruses will be added than  
156 L2, and more L2 than L3/4, continuing the current trend (Figure S1). For this reason, we  
157 consider our estimate that 74% of L3/4 viruses arose from L1 lineages to be conservative.

158

159 We did not include two important taxa in our main analysis. The *Influenza A virus* genus was  
160 excluded *a posteriori* because of a very weak phylogenetic signal for IT level (Figure S9). On  
161 inspection of the HA gene phylogeny it is apparent that although human infectivity and  
162 transmissibility have evolved in only a few lineages (HA types) there is considerable variability  
163 in IT level within those lineages, which would generate inflated counts of IT level change  
164 (Figure S10). Nonetheless, the phylogeny is broadly consistent with the pattern that most L3/4  
165 lineages evolve from L1 lineages. We excluded Retroviridae from our main analysis *a priori*  
166 because they cause chronic infections that allow far more time for within-host evolution prior  
167 to transmission<sup>9</sup>. Consistent with this, we find that transmissible human lentiviruses (lineages



168 of HIV-1 and HIV-2) are most likely have evolved through L1-L2-L3/4 transitions rather than  
169 L1-L3/4 (Figure S11).

170

171 Our results show that at least 74% of L3/4 non-RT RNA virus lineages (e.g. human  
172 coronaviruses 229E and NL63, measles virus, human respiratory syncytial virus, hepatitis C  
173 virus and Aichi virus A) are most likely to have emerged directly from reservoirs of L1 viruses.  
174 Stepwise emergence to L2 then L3/4 occurs infrequently and mainly in vector-borne viruses.  
175 This result is consistent with epidemiological observation: there are no well-supported  
176 examples of any of the >100 species of L2 non-RT RNA viruses evolving the capacity to  
177 transmit in human populations<sup>6</sup>. We also estimate that diversification within L3/4 lineages has  
178 contributed significantly to human RNA virus diversity, accounting for 30% of species (Figure  
179 1). However, a larger fraction, at least 51%, has been generated directly from L1 lineages.

180

181 The evolution of a new (and extant) lineage of L3/4 non-RT RNA viruses appears a relatively  
182 infrequent event; there are just 57 instances over the entire evolutionary history of the genera  
183 considered here, with no suggestion of any recent (on an evolutionary time scale) increase in  
184 frequency (Figure S4). Unexpectedly, the same applies to L2 viruses; these are generated from  
185 L1 viruses at similar rates as L3/4 viruses and at similar relative node depths (Figures 3g and  
186 S4, Table S3). We have previously suggested an alternative model where the L2 trait is easily  
187 evolved and easily lost<sup>3</sup>, but this model is not supported by the analysis reported here.  
188 Importantly, these findings do not preclude extant pools of L2 and L3/4 viruses that have yet  
189 to be recognised and may not yet have had the opportunity to enter human populations<sup>16</sup>, but  
190 they do imply that the drivers for the emergence of novel human viruses, with or without  
191 epidemic potential, would be ecological rather than evolutionary.

192

193 That there was no detectable difference in the relative rates at which L3/4 viruses emerge from  
194 L2 and non-human (L1) virus lineages (Figure 3g) implies that the distributions of parameters  
195  $a$  and  $c$  in our conceptual model (Figure 1) are similar. Given that, an obvious explanation for  
196 the rarity of L2-L3/4 transitions is that the pool of L1 viruses is much larger than that of L2  
197 viruses, as is widely supposed<sup>10,12</sup>. Moreover, most L2-L3/4 transitions involve vector-borne  
198 viruses. Vector-borne pathogens tend to have wide host ranges<sup>17</sup>, possibly due to the  
199 transmission route providing direct access to the blood system. There is a substantial deficit of  
200 vector-borne L1 viruses in our database (Data File 4), consistent with the L2 pool being  
201 relatively larger for vector-borne viruses, thus explaining why we found most L2-L3/4



202 transitions in this category. In addition, we found that L1 (-)ssRNA virus lineages are relatively  
203 more likely to generate L2 than L3/4 viruses (Table 1) and, once this was accounted for, there  
204 was no additional effect of a virus having an envelope, as has been suggested previously<sup>5</sup>.  
205 Nonetheless, this is a large group and (-)ssRNA virus lineages are an important source of L3/4  
206 viruses (Figure 3d).

207

208 The absence of a clear association between human infectivity and human transmissibility may  
209 reflect the key role that cell receptors play in determining a virus's capacity to infect and be  
210 transmitted by humans<sup>16,18</sup>. Cell receptor usage varies between virus genera and sometimes  
211 within genera<sup>9</sup>. Host switching (to humans, or to any other new host) is facilitated by a virus  
212 using a cell receptor with an amino acid sequence that is conserved between hosts<sup>16</sup>. However,  
213 if the receptor has a different tissue distribution in humans then infectivity may not equate with  
214 transmissibility<sup>18</sup>. Evolutionary shifts in receptor usage can therefore lead to changes in human  
215 infectivity (L1 to L2) or transmissibility (L2 to L3/4) or both (L1 to L3/4).

216

217 Our study supports a recent proposal for a large-scale survey of viral diversity in non-human  
218 reservoirs, the Global Virome Project (GVP)<sup>11</sup>. Though this idea is controversial and would be  
219 costly to implement<sup>19</sup>, its relevance is underlined by our finding that most species of human-  
220 transmissible viruses (L3/4) evolve from mammal/bird RNA virus lineages not known to be  
221 infective to humans (L1), coupled with the expectation that the great majority of mammal and  
222 bird viruses are still unrecognised<sup>12</sup>. We note recent progress in using machine learning to  
223 predict host range from sequence data<sup>20</sup> and the potential of this kind of approach to help  
224 identify human-infective and human-transmissible viruses even in the absence of human cases.

225

226 Finally, our study also provides empirical support for, and underlines the public health  
227 importance of, “Disease X”, the scenario that a future serious international epidemic might be  
228 caused by a pathogen taxon not currently known to affect humans<sup>21</sup>. We find that the ability of  
229 RNA viruses to transmit between humans most frequently evolves in a manner consistent with  
230 the “Disease X” model of emerging infections.

## REFERENCES

- 1 Woolhouse, M. E. J., Rambaut, A. & Kellam, P. Lessons from Ebola: Improving infectious disease surveillance to inform outbreak management. *Sci Transl Med* **7**, (2015).
- 2 Wolfe, N. D., Dunavan, C. P. & Diamond, J. Origins of major human infectious diseases. *Nature* **447**, 279-283, (2007).
- 3 Olival, K. J. *et al.* Host and viral traits predict zoonotic spillover from mammals. *Nature* **546**, 646-650, (2017).
- 4 ME, J. W., Adair, K. & Brierley, L. RNA Viruses: A Case Study of the Biology of Emerging Infectious Diseases. *Microbiol Spectr* **1**, (2013).
- 5 Geoghegan, J. L., Senior, A. M., Di Giallonardo, F. & Holmes, E. C. Virological factors that increase the transmissibility of emerging human viruses. *P Natl Acad Sci USA* **113**, 4170-4175, (2016).
- 6 Woolhouse, M. E. J., Brierley, L., McCaffery, C. & Lycett, S. Assessing the Epidemic Potential of RNA and DNA Viruses. *Emerg Infect Dis* **22**, 2037-2044, (2016).
- 7 Walker, J. W., Han, B. A., Ott, I. M. & Drake, J. M. Transmissibility of emerging viral zoonoses. *PLoS One* **13**, e0206926, (2018).
- 8 Woolhouse, M. E. J. & Brierley, L. Epidemiological characteristics of human-infective RNA viruses. *Sci Data* **5**, 180017, (2018).
- 9 Lefkowitz, E. J. *et al.* Virus taxonomy: the database of the International Committee on Taxonomy of Viruses (ICTV). *Nucleic Acids Res* **46**, D708-D717, (2018).
- 10 Geoghegan, J. L. & Holmes, E. C. Predicting virus emergence amid evolutionary noise. *Open Biol* **7**, (2017).
- 11 Carroll, D. *et al.* The Global Virome Project. *Science* **359**, 872-874, (2018).
- 12 Carlson, C. J., Zipfel, C. M., Garnier, R. & Bansal, S. Global estimates of mammalian viral diversity accounting for host sharing. *Nat Ecol Evol*, (2019).
- 13 Antia, R., Regoes, R. R., Koella, J. C. & Bergstrom, C. T. The role of evolution in the emergence of infectious diseases. *Nature* **426**, 658-661, (2003).
- 14 Pepin, K. M., Lass, S., Pulliam, J. R. C., Read, A. F. & Lloyd-Smith, J. O. Identifying genetic markers of adaptation for surveillance of viral host jumps. *Nat Rev Microbiol* **8**, 802-813, (2010).
- 15 Geoghegan, J. L., Duchene, S. & Holmes, E. C. Comparative analysis estimates the relative frequencies of co-divergence and cross-species transmission within viral families. *PLoS Pathog* **13**, e1006215, (2017).
- 16 Woolhouse, M., Scott, F., Hudson, Z., Howey, R. & Chase-Topping, M. Human viruses: discovery and emergence. *P Roy Soc B-Biol Sci* **367**, 2864-2871, (2012).
- 17 Woolhouse, M. E., Taylor, L. H. & Haydon, D. T. Population biology of multihost pathogens. *Science* **292**, 1109-1112, (2001).
- 18 Kuiken, T. *et al.* Host species barriers to influenza virus infections. *Science* **312**, 394-397, (2006).
- 19 Holmes, E. C., Rambaut, A. & Andersen, K. G. Pandemics: spend on surveillance, not prediction. *Nature* **558**, 180-182, (2018).
- 20 Babayan, S. A., Orton, R. J. & Streicker, D. G. Predicting reservoir hosts and arthropod vectors from evolutionary signatures in RNA virus genomes. *Science* **362**, 577-+, (2018).
- 21 Friedrich, M. J. WHO's Blueprint List of Priority Diseases. *JAMA* **319**, 1973, (2018).

## ACKNOWLEDGEMENTS

We are grateful to Andrew Rambaut and Paul Sharp for helpful discussions, and to Alex Bhattacharya for assistance with data preparation. **Funding:** This work was supported by the Wellcome Trust (VIZIONS, ref. 093724), the European Commission H2020 programme (COMPARE, contract number 643476) and BBSRC Institute Strategic Programme Grant: Control of Infectious Diseases (BBS/E/D/20002173). **Competing interests:** None declared. **Author contributions:** L.L., S.L., P.S. and M.W. designed the study. L.L., L.B. and F.Z. assembled the data sets. L.L., G.R. and M.C-T performed the analyses. D.S. validated some of the phylogenies. L.L. and M.W. wrote the manuscript. All authors reviewed, commented on and approved the manuscript. **Data availability:** The raw data used in these analyses are all freely available in the Data Files. These include links to sequence data in GenBank.

TABLES

**Table 1.** Ancestor node traits as predictors of IT level transitions.

| <b>Variables</b>       | <b>Coefficient</b> | <b>Lower 95% confidence level</b> | <b>Upper 95% confidence level</b> | <b>X<sup>2</sup></b> | <b>df</b> | <b>P value</b> |
|------------------------|--------------------|-----------------------------------|-----------------------------------|----------------------|-----------|----------------|
| Genome type:           | -                  | -                                 | -                                 | 10.4                 | 3         | 0.016          |
| Enveloped (+)ssRNA     | 2.05               | 0.19                              | 3.90                              | -                    | -         | -              |
| Non-enveloped (+)ssRNA | 1.50               | 0.11                              | 2.88                              | -                    | -         | -              |
| dsRNA                  | 2.32               | 0.30                              | 4.33                              | -                    | -         | -              |
| Vector-borne           | -1.29              | -3.10                             | 0.51                              | 2.0                  | 1         | 0.16           |

Outputs are from a binomial GLMM with genus as a random factor. The model compares L1-L3/4 to L1-L2 transitions, reporting log-odds, 95% confidence intervals, and results of Wald tests. Genome type and enveloped/non-enveloped are combined as a composite variable with 4 levels. Reference categories are (-)ssRNA and non-vector-borne. N=86 (see Figure S3).

## FIGURES

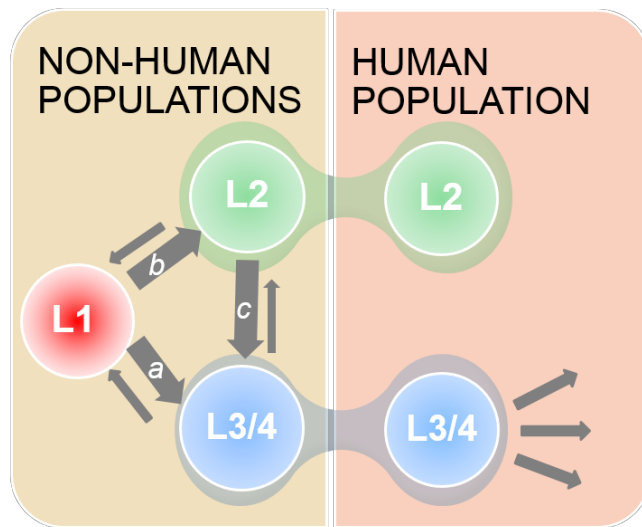

**Figure 1.** Conceptual model of non-RT RNA virus emergence into human populations. Viruses circulating in the non-human reservoir may not be infective to humans (L1) or have the potential to infect or infect and transmit between humans (L2 and L3/4 respectively). Virus lineages in the reservoir may acquire (thick grey arrows showing rates  $a$ ,  $b$  and  $c$ ) or lose (thin grey arrows) the capacities to infect and/or transmit in humans through genetic drift – these traits are not under direct selection in the non-human reservoir. L2 and L3/4 viruses in non-human hosts may cross the species barrier and enter human populations. L3/4 (but not L2) viruses may then spread and evolve independently in the human population (multiple grey arrows). Phylogenetic analyses identify past transitions between L1 and L3/4, L1 and L2 and L2 and L3/4 viruses and can be used to estimate the relative values of parameters  $a$ ,  $b$  and  $c$ .

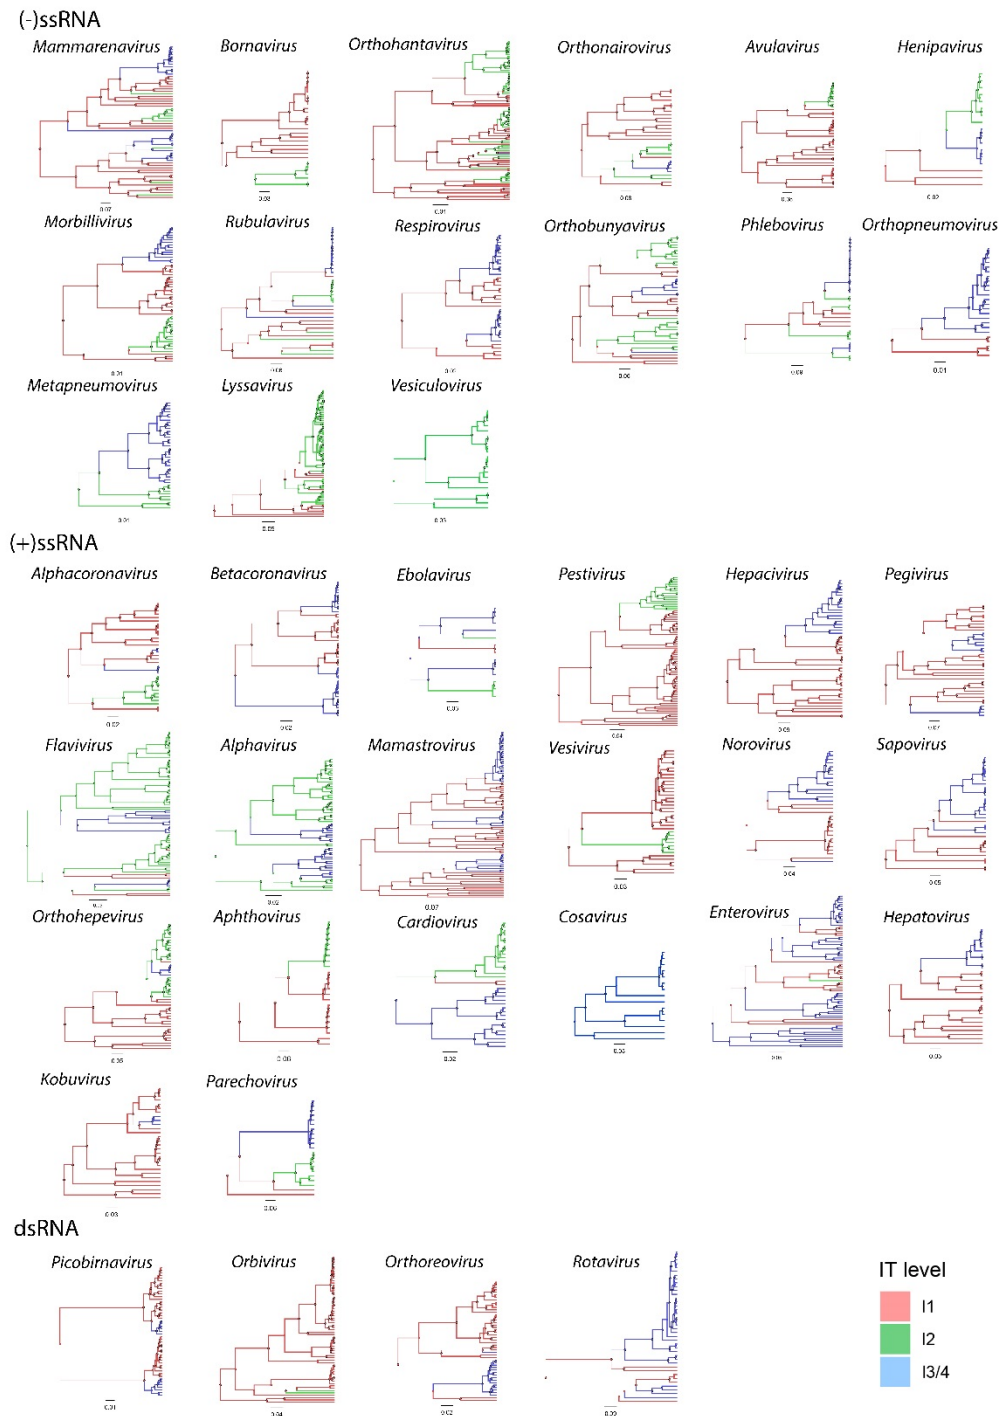

**Figure 2.** Bayesian maximum clade credibility (MCC) trees for members of 39 virus genera showing the most probable transitions between non-human viruses (red), viruses infective to humans (green) and viruses transmissible in human populations (blue). Phylogenies are arranged by genome type. Raw data are provided in Data File 5.

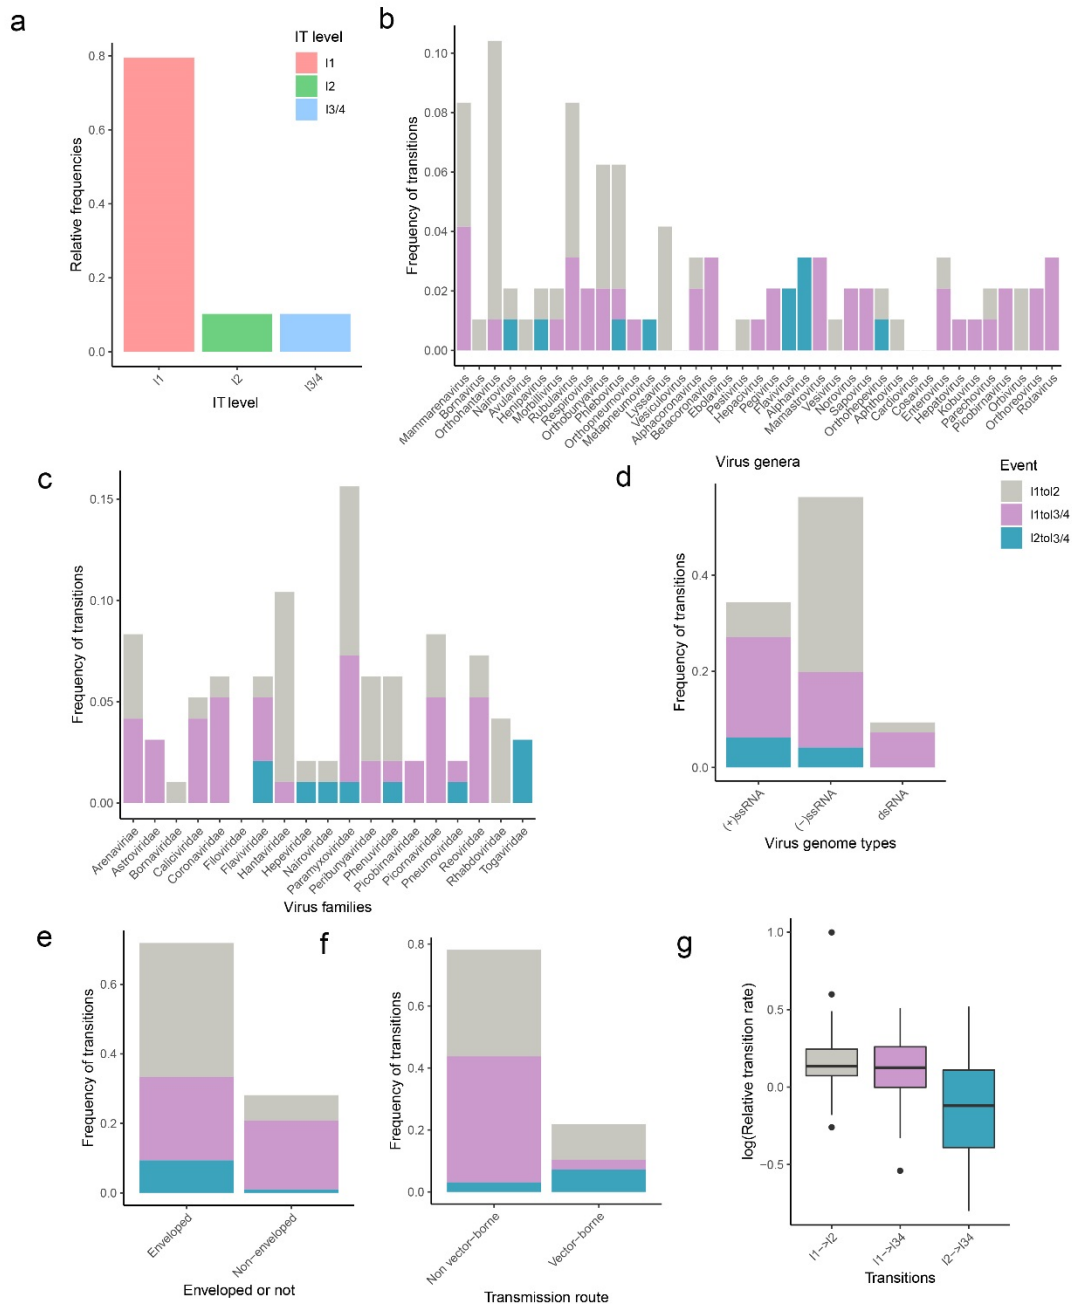

**Figure 3.** Outputs of discrete trait analyses. **a**) Frequency of estimated infection/transmission (IT) level (L1, L2 or L3/4) for the ancestral nodes of the mammal/bird clade in each genus (see Figure 2). **b**) Frequency of forward transitions by virus genus and whether enveloped. Three transitions are distinguished: L1 to L2 (grey), L1 to L3/4 (purple) and L2 to L3/4 (cyan). N=96. Vector-borne genera indicated with asterisks. **c**) As **b** by virus family. **d**) As **b** by virus genome type. **e**) As **b** by enveloped/non-enveloped. **f**) As **b** by vector-borne/non-vector-borne. **g**) Boxplots showing distribution of genus-level,  $\log_e$ -transformed relative transition rates for level transitions: L1-L2 (N=21), L1-L3/4 (N=26), L2-L3/4 (N=18). The rates used in the plot are shown in Figure S6.



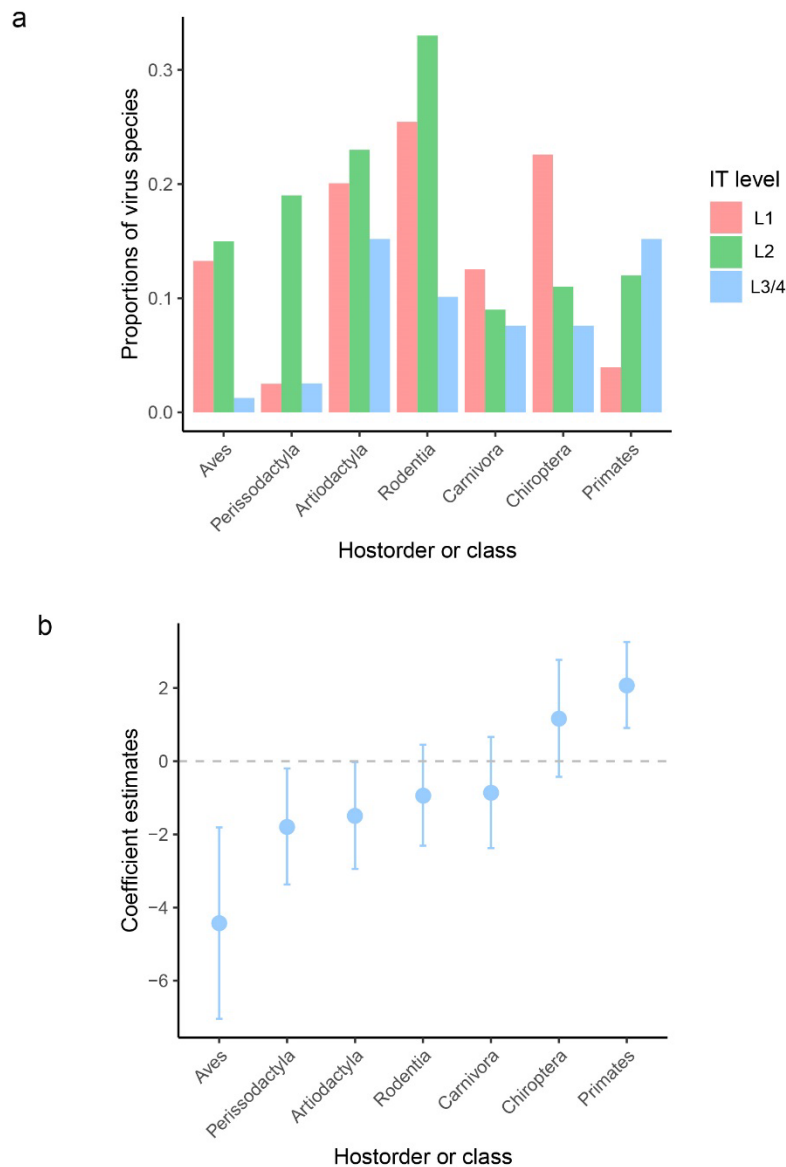

**Figure 4.** Human-transmissible virus in nonhuman host. a) The proportions of virus species of different IT levels being known to infect a given non-human host category (six orders of mammal and the Class Aves). b) Results for GLMMs with binary responses for association between viruses within a species/subtype being human-transmissible (L3/4) and being known to infect a given non-human host category. Coefficient estimates (with 95% CIs) are compared for six orders of mammal and the Class Aves of L3/4 virus species relative to L2 virus species. Coefficient estimates greater than zero correspond to a positive association. Models include a random term for each observation to account for over-dispersion. Genus and family are included as random effects.

# Supplementary Materials for

## **Evolutionary origins of epidemic potential among human RNA viruses**

Lu Lu<sup>1\*</sup>, Liam Brierley<sup>2</sup>, Gail Robertson<sup>3</sup>, Feifei Zhang<sup>1</sup>, Samantha Lycett<sup>4</sup>, Donald Smith<sup>5</sup>,  
Margo Chase-Topping<sup>1,4</sup>, Peter Simmonds<sup>6</sup>, Mark Woolhouse<sup>1</sup>

Correspondence to: [lu.lu@ed.ac.uk](mailto:lu.lu@ed.ac.uk)

### **This PDF file includes:**

Materials and Methods

Figs. S1 to S14

Tables S1 to S4

References

### **Other Supplementary Materials for this manuscript include the following:**

Data File 1 to Data File 9

20 SUPPLEMENTARY MATERIALS

21 Materials and Methods

22 Data

23 We compiled a data pool of 7488 polymerase (or functional equivalent) gene sequences from  
24 non-RT RNA viruses found naturally (i.e. excluding deliberate laboratory exposures) in  
25 humans, other mammals or birds and reported in the NCBI GenBank database<sup>1</sup>. Inclusion  
26 criteria were that complete or nearly complete polymerase protein sequences were available,  
27 together with information of natural infected host (mammal or bird only) species and isolation  
28 date (year). No sequence data were available for 30 otherwise eligible human-infective virus  
29 species and these could not be included in the analysis – all of these were rare viruses, the  
30 majority of which have not been reported in humans for at least 10 years. For some zoonotic  
31 virus species, sequences were only available from non-human hosts. To reduce sampling bias,  
32 especially of human viruses, we then subsampled the dataset to keep no more than five  
33 sequences per host species per virus species/subtype and to avoid clusters of sequences from  
34 single outbreaks.

35  
36 We linked individual sequences to infectivity/transmissibility (IT) level: L1, L2 or L3/4 as  
37 defined in the main text. IT level was attributed using an updated version of a recently  
38 published epidemiological data set but six viruses that are transmitted between humans only  
39 by vertical and/or iatrogenic routes<sup>2</sup> were categorised here as L2. Four virus species (*Norovirus*,  
40 *Sapovirus*, *Orthohepevirus A*, *Aichivirus A*) for which there are recognised subtypes that differ  
41 in IT level were included as subtypes rather than single species.

42  
43 Seven virus genera (*Coltivirus*, *Erbovirus*, *Marburgvirus*, *Seadornavirus*, *Thogotovirus*,  
44 *Tibrovirus* and *Torovirus*) were excluded because there were too few sequences (<15) for  
45 analysis. Three genera (*Deltavirus*, *Rubivirus* and *Salivirus*) provided no useful information  
46 because they each contain a single L3/4 species known only from humans. Two genera  
47 (*Influenza B virus* and *Influenza C virus*) had too few non-L3/4 sequences available (one and  
48 three respectively). The *Influenza A virus* genus was considered separately from the main  
49 analysis as BaTS tests indicated that there is a uniquely poor association between IT level and  
50 polymerase phylogeny for this taxon (see below). Retroviridae (three genera with human-  
51 infective species) were excluded *a priori* from our main analysis given their markedly different

52 biology<sup>3</sup>. However, we carried out a separate analysis for the one genus – *Lentivirus* – with  
53 sufficient *pol* protein sequences available.

54

55 Our main data set comprised 1755 sequences from 39 non-RT RNA virus genera (31 with  
56 human-transmissible (L3/4) viruses) for analysis. We linked these sequences to the host  
57 category from which the virus was isolated, as nine taxonomic orders of the Class Mammalia  
58 (distinguishing humans and non-human primates), plus marsupials and collectively the Class  
59 Aves (noting that <5 sequences were available from Eulipotyphla, Lagomorpha, Scandentia  
60 and marsupials, with the remaining mammalian orders not represented at all). One multi-  
61 species genus, *Cosavirus*, was represented only by sequences from human hosts. Links to the  
62 sequences and associated metadata are provided in Data File 4.

63

#### 64 Phylogenetic analysis

65 We performed parallel phylogenetic analyses using the BEAST software package<sup>4</sup> (V1.8.2).  
66 We were primarily interested in tree topology; branch lengths scale to numbers of amino acid  
67 substitutions and we did not attempt to date the nodes – such estimates are likely to be  
68 unreliable given the long time scales involved<sup>5</sup>. For every virus genus, polymerase gene  
69 sequences were translated to amino acid and aligned with MUSCLE V3.8.4<sup>6</sup>, and we  
70 reconstructed Bayesian time-scaled phylogenies for each of the 39 genera and perform discrete  
71 traits analysis with respect to IT level. Our methodology is comparable to the approach used in  
72 Ref.<sup>7</sup>.

73

74 We tested the associations between IT levels and polymerase trees per genus using Phylogeny-  
75 trait association test (BaTS)<sup>8</sup>, inspecting both the Association index (AI) and Parsimony score  
76 (PS) between genera. We observed that the *Influenza A virus* genus showed evidence of a  
77 uniquely weak phylogenetic signal (Fig. S9a) so this genus was subsequently considered  
78 separately from the main analysis. Similar results were obtained using phylogenies based on  
79 surface proteins as described below (Fig. S9b).

80

81 We estimated the phylogenies of the sequences using a Bayesian Markov chain Monte Carlo  
82 (MCMC) method that was implemented using the Bayesian evolutionary analysis in BEAST.  
83 Different combinations of substitution models, clock models and population size models were  
84 evaluated by using the path sampling (PS) to estimate marginal likelihoods<sup>9</sup>. The best fitting  
85 model was a WAG model with a gamma distribution (G) across sites as the substitution model,

86 with an uncorrelated log-normal relaxed molecular clock model and with a constant size  
87 coalescent process or Yule process prior over the phylogenies. Here, we allowed the branch  
88 length to be scaled by substitution per site rather than by time (with `uclid.mean` equal to 1). The  
89 MCMC chains were run for 100 million iterations with sub-sampling every 10,000 iterations  
90 and 10% burn-in and at least two replicates were performed per genus. MCMC convergence  
91 and effective sample size of parameter estimates were evaluated using Tracer 1.5  
92 (<http://beast.bio.ed.ac.uk>). Summary Maximum Clade Credibility phylogenies were created  
93 from the posterior samples of trees using TreeAnnotator, and a further sample of 1000 trees  
94 was extracted from each genus-level posterior sample for additional processing. We validated  
95 our phylogenies of the mammal/bird virus clade by comparing their topologies with the  
96 representative phylogenies on the family/genus level published by ICTV<sup>3</sup>, noting that we are  
97 missing sequences/species that did not meet our inclusion criteria.

98

99 We applied asymmetric discrete trait models using BEAST to estimate IT level over each  
100 genus-level posterior sample of 1000 trees<sup>10</sup>. The instantaneous transition probabilities  
101 between IT levels (equivalent to the relative rates matrix) were estimated simultaneously. All  
102 the Bayesian phylogenies mapped by IT level traits are provided in Data File 5.

103

104 For each genus-level phylogeny we obtained the estimated the probability distributions for IT  
105 level at the root ancestral node. Transitions were identified as a change in the most probable IT  
106 level estimated for any two adjacent nodes on the phylogeny (Fig. 2). We counted all  
107 occurrences within each tree of the three possible types of ‘forward’ transition: L1 to L2 (non-  
108 human virus acquiring human infectivity); L1 to L3/4 (non-human virus acquiring human  
109 infectivity and transmissibility); and L2 to L3/4 (infective but non-transmissible virus  
110 acquiring human transmissibility). Instances of the possible ‘backward’ transitions (L2 to L1,  
111 L3/4 to L1 and L3/4 to L2) were also recorded.

112

113 We also applied Markov Jumps<sup>11</sup> with discrete trait model to estimate and validate the  
114 expected number of level transitions in the phylogenetic trees (an example XML file shown  
115 in Data File 6). We obtained excellent agreement between median estimates of numbers of  
116 forward transitions using Markov jumps and counts estimated from our discrete traits analysis  
117 (Table S1, Fig. S12a). We were also able to reproduce the patterns of variation between virus  
118 types and taxa with minimal discrepancies (compare Figs 2b-f and S13a-e). Outputs are  
119 compared in full in Data File 7.

120

121 In addition, we applied parsimony reconstruction models to trace trait evolution, using  
122 Mesquite V 3.5.1 (<http://www.mesquiteproject.org>), with the input phylogenies being generated  
123 with the protein sequences of each virus genus via maximum likelihood method, using RaxML  
124 V 8 (WAG+G, bootstraps n=1000)<sup>12</sup>. We obtained excellent agreement between mean  
125 estimates of numbers of forward transitions using parsimony analysis and counts estimated  
126 from our discrete traits analysis (Table S1, Fig. S12b), noting that the parsimony approach does  
127 not identify individual nodes involved in transitions. Outputs are compared in full in Data File  
128 7.

129

130 To test the robustness of our results to the choice of RNA-dependent RNA polymerase protein  
131 sequences to construct our phylogenies we compared results using different proteins. We used  
132 1560 surface protein amino acid sequences (Data File 8) to generate alternative phylogenies  
133 for 35 genera (Fig. S8), by mapping the correspondent surface protein with polymerase protein  
134 from the same virus strain. We found only a small number of discrepancies between numbers  
135 of L1-L2, L1-L3/4 and L2-L3/4 transitions for the two sets of phylogenies (Fig. S14), with  
136 total numbers of the three transition types differing by -5, -1 and +1 respectively (Data File 9).

137

### 138 Statistical analysis

139 We used Fisher's exact tests to examine whether relative frequencies of transitions between  
140 different IT levels varied among families, genera, genome types, and between vector-  
141 borne/non-vector-borne viruses. We then compared frequencies of L1-L2 and L1-L3/4  
142 transitions using a binomial generalised linear mixed model (GLMM) with transition type as  
143 the response variable, genome/enveloped type and vector-borne/non-vector-borne as  
144 explanatory variables and genus as a random factor (using the R package 'lme4'). We  
145 constructed a composite variable representing the genome type and enveloped structure of  
146 viruses involved in transition events. This had four levels: (-)ssRNA (all enveloped), (+)ssRNA  
147 enveloped, (+)ssRNA non-enveloped, and dsRNA (all non-enveloped). Models with genus as  
148 the only random factor and models with both genus and family as random factors had similar  
149 AIC values ( $\Delta AIC < 2$ ), so the former were used in all analyses.

150

151 We calculated the depth of the node of each transition on the genus-level phylogenetic tree  
152 relative to the ancestral node (Fig. S4 and Data Files 2 and 3). We used a beta distributed  
153 GLMM (using the R package 'glmmTMB'<sup>13</sup>) to compare node depth (response variable) across

154 level transition types (explanatory variable) with genus as a random factor. We used a linear  
155 mixed model (LMM) with a normal distribution to compare  $\log_e$ -transformed transition rates  
156 (response variable) by level transition groups (explanatory variable) with genus as a random  
157 factor. We also included genome type/enveloped and vector-borne in the model as potential  
158 confounding variables.

159

160 We tested for an association between host range and IT level in two ways. First, we considered  
161 known non-human hosts of the 179 human virus species/subtypes in our data set, using  
162 availability of virus sequence as a gold standard indicator of host range. Second, we considered  
163 known non-human hosts for all viruses from each of 39 genera using the same criteria. For  
164 these analyses, we classified species/subtypes and genera as non-human-transmissible if they  
165 occurred in a genus or family respectively that contained only viruses incapable of epidemic  
166 spread in human populations (i.e. L2 or L3). To compare host range distributions at  
167 species/subtype and genus levels we used GLMMs with binary responses to generate odds  
168 ratios for containing human-transmissible viruses, with 95% confidence limits, by host  
169 category. We included genus and family plus genus respectively as random effects to allow for  
170 taxonomic relatedness.

171



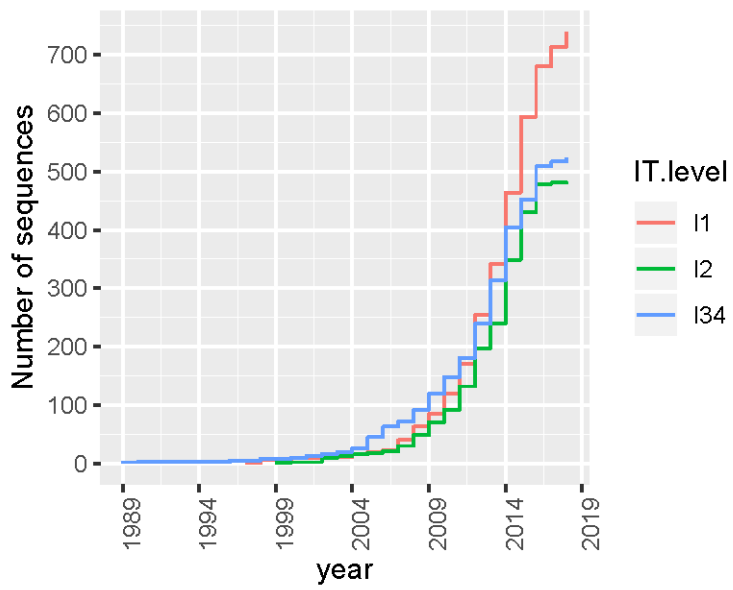

172

173

174 **Fig. S1.** Numbers of sequences used in this study cumulated by year of submission to Genbank.

175 L1, L2 and L3/4 viruses are distinguished.

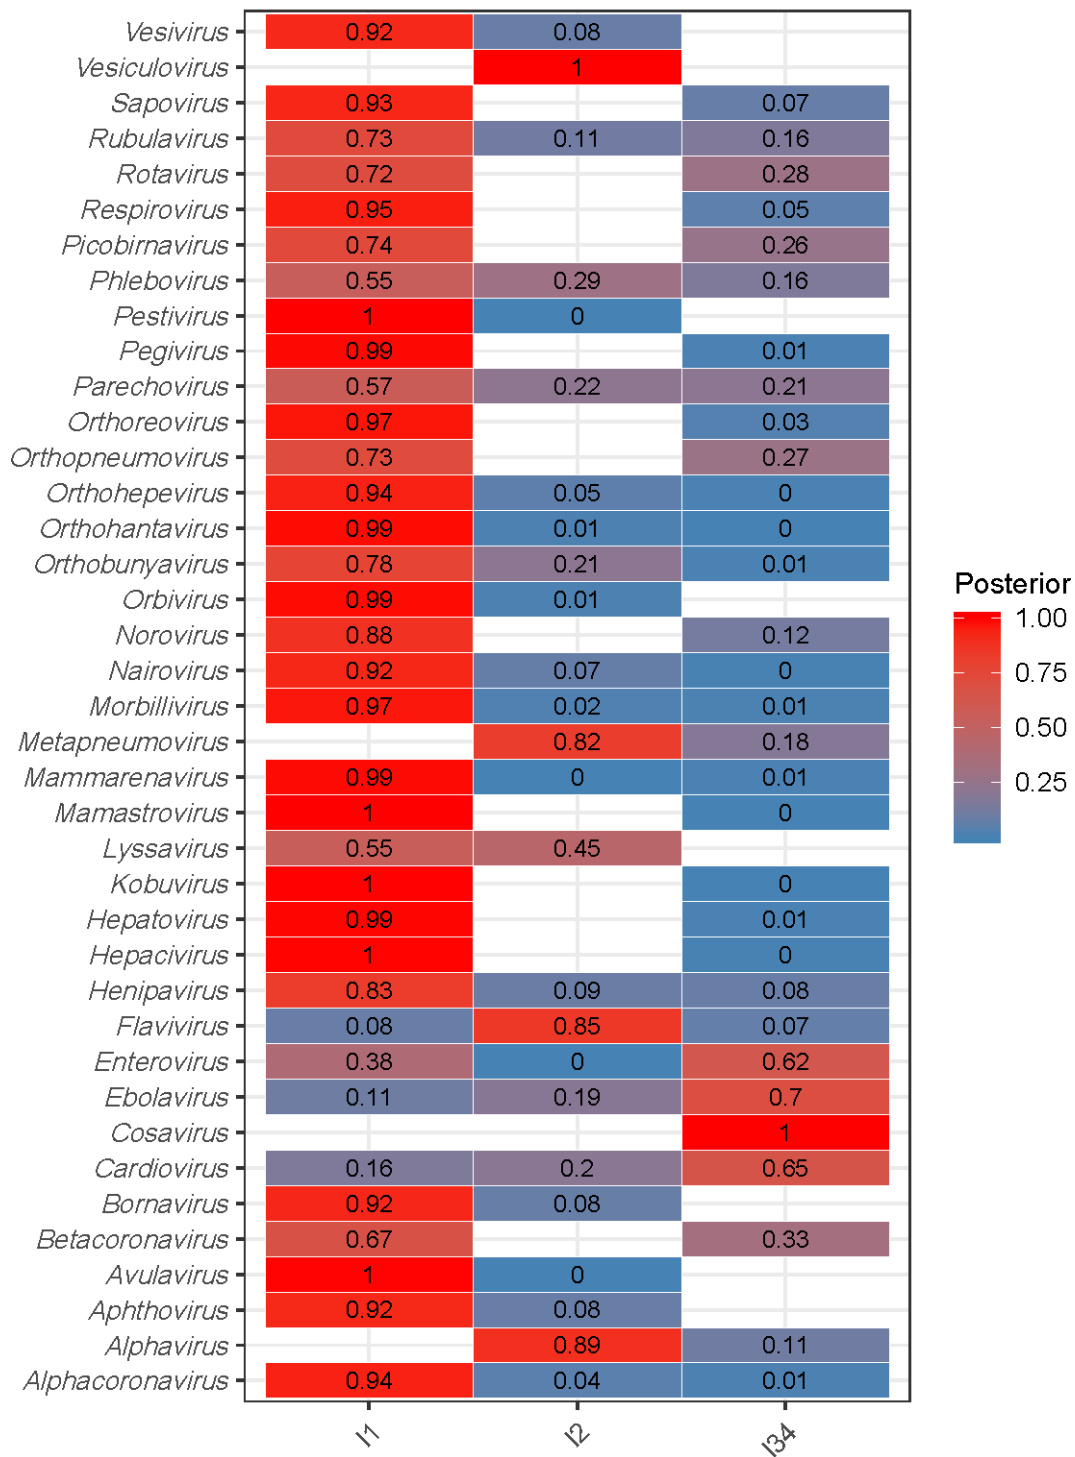

**Fig. S2.** Heat map showing the estimated probabilities that the ancestor for each genus (N=39) was a L1, L2 or L3/4 virus. Blank entries indicate that no sequences from viruses at this IT level were available.

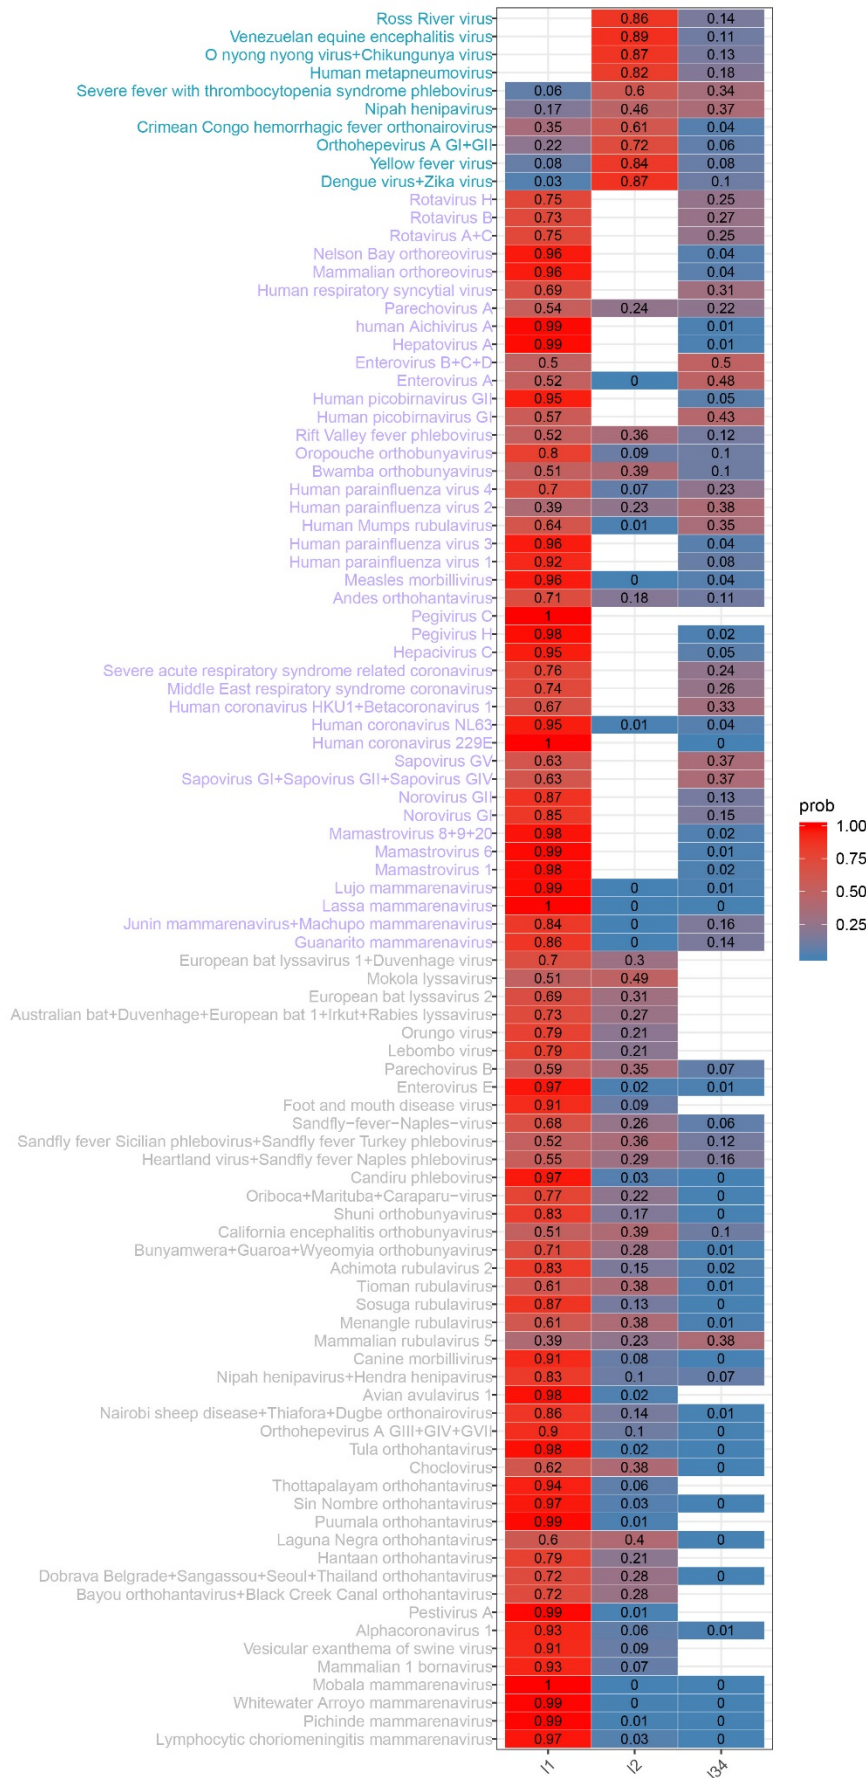

**Fig. S3.** Heat map showing the total estimated probabilities that the ancestral node for each forward transition (N=96) was a L1, L2 or L3/4 virus. Three transitions are distinguished: L1 to L2 (greylabeled), L1 to L3/4 (purple) and L2 to L3/4 (cyan). Blank entries indicate that no sequences from viruses at this level were present in the sequence database.

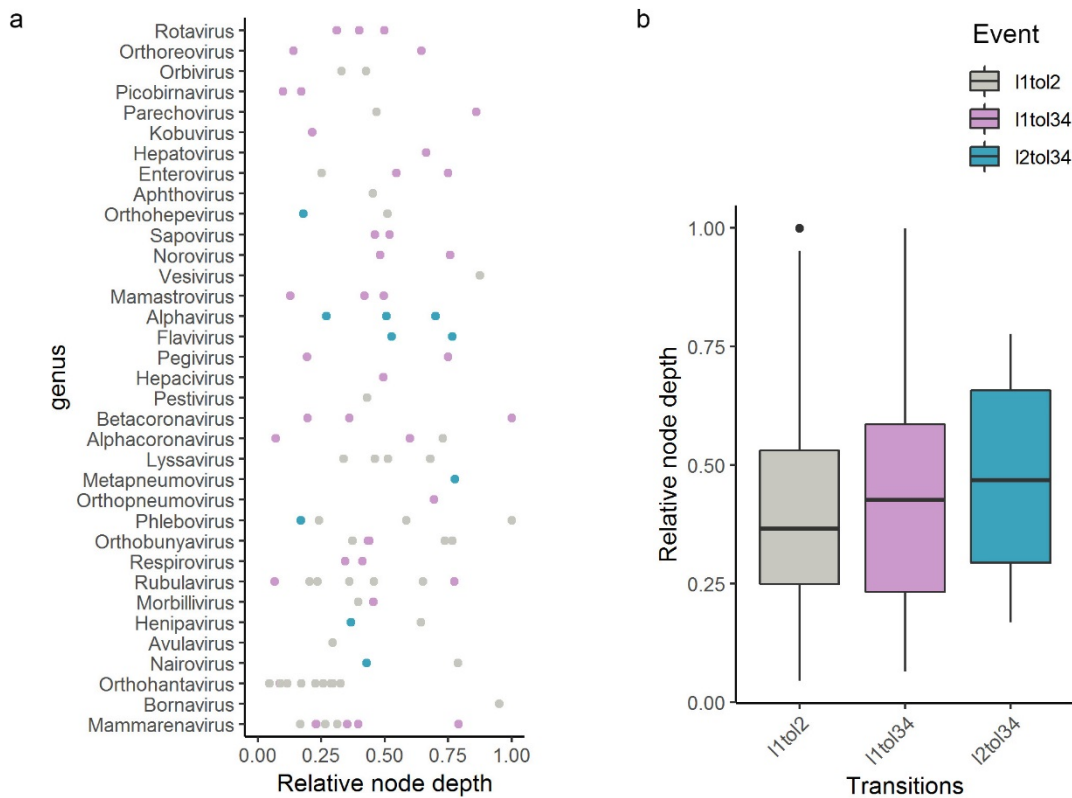

**Fig. S4.** Relative node depths of transitions by genus. Three transitions are distinguished: L1 to L2 (grey), L1 to L3/4 (purple) and L2 to L3/4 (cyan), shown in a) dotplot per genus, b) boxplot per transition. Relative node depths are given in Data File 2.

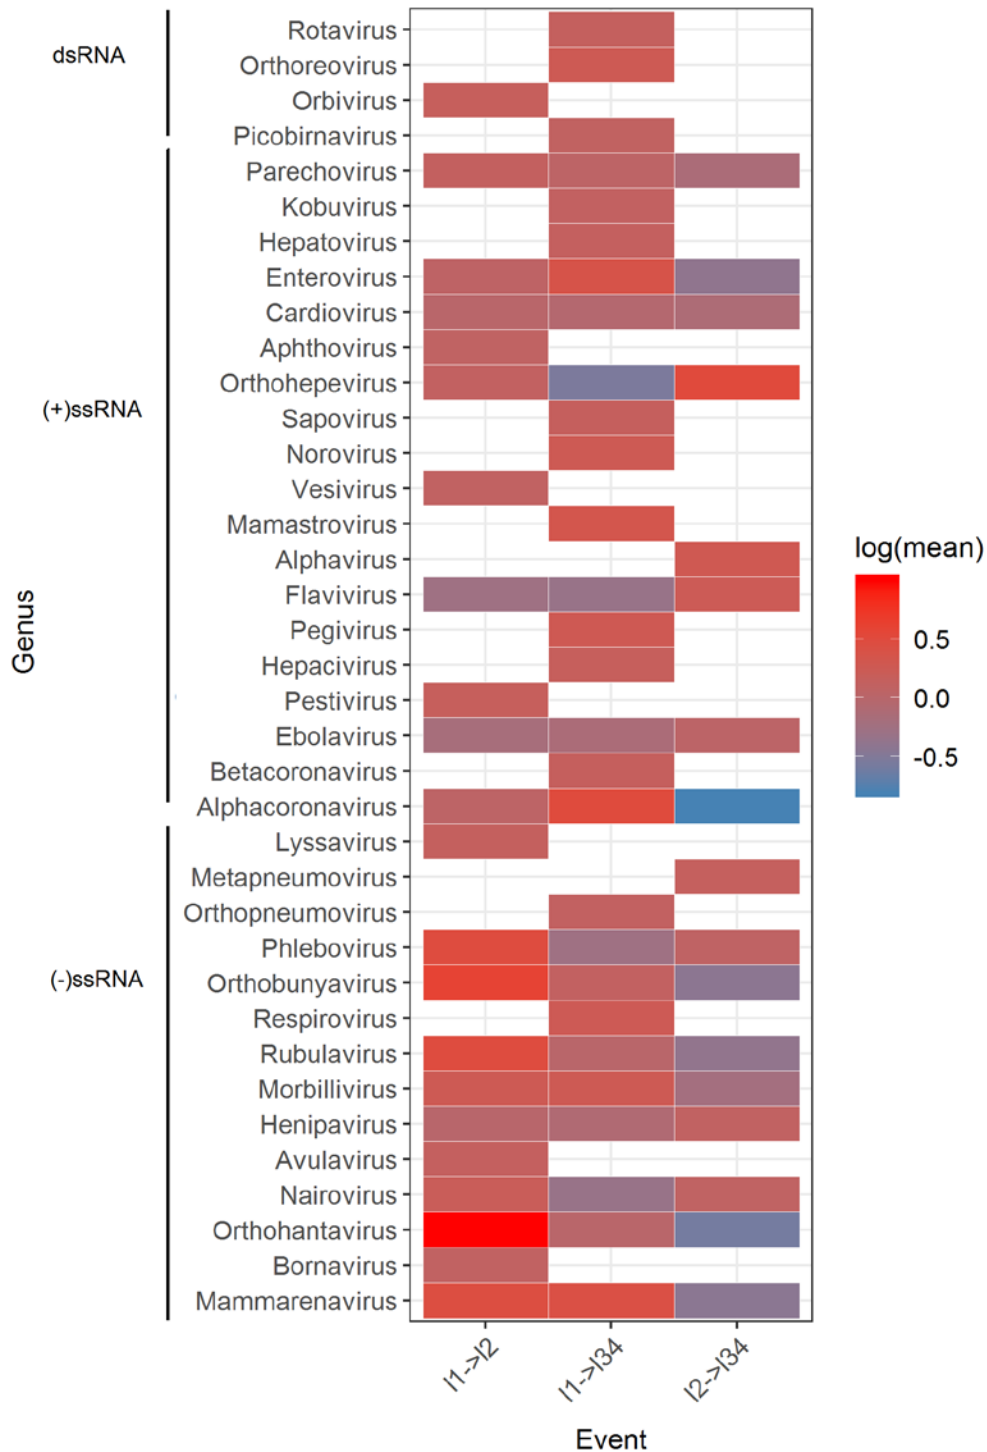

**Fig. S5.** Comparison of instantaneous rates of L1-L2, L1-L3/4 and L2-L3/4 transitions for each genus, using mean relative transition rates on a log scale (see Fig. S6). Blank entries indicate that a transition was not possible in this genus given the information available.

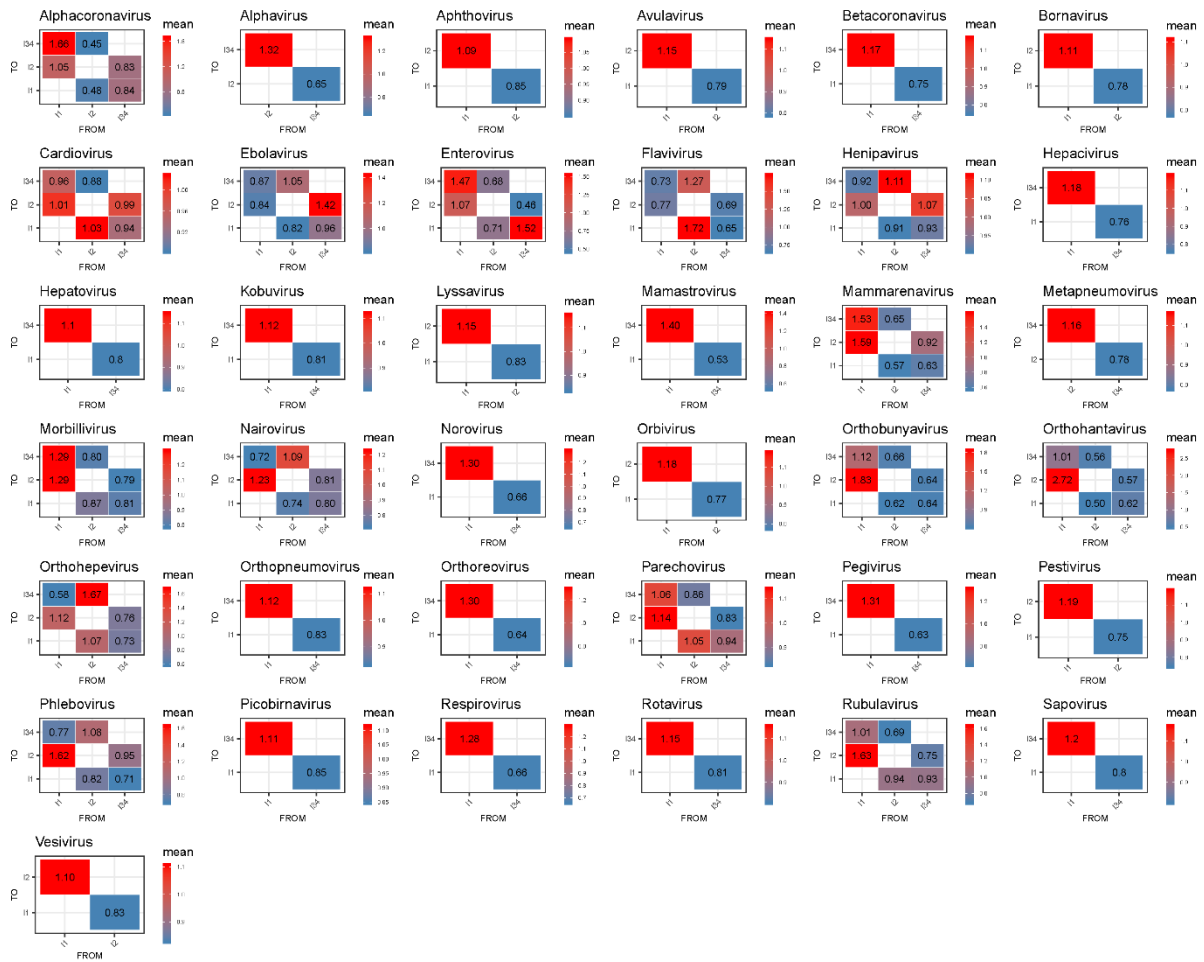

**Fig. S6.** Transmission matrices of relative transition rates between IT levels in each genus with  $\geq 1$  transition (N=37). The mean estimates of instantaneous transition rates are shown.



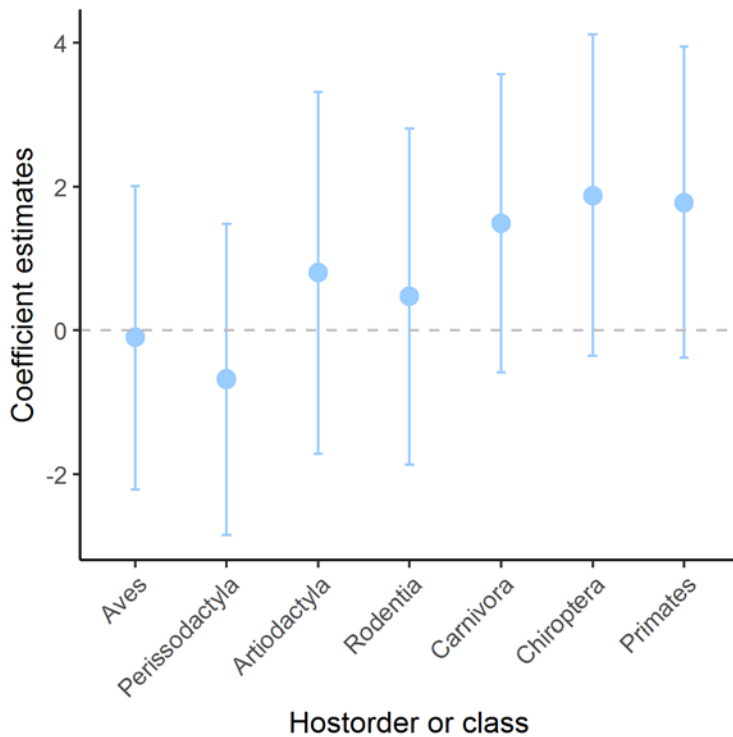

**Fig. S7.** Results for GLMMs with binary responses of the association between viruses within a genus being human-transmissible (L3/4) and being known to infect a given non-human host category. Coefficient estimates (with 95% CIs) are compared for six orders of mammal and the Class Aves. Coefficient estimates greater than zero correspond to a positive association. Models include a random term for each observation to account for over-dispersion. Family is included as a random effect. See also Fig. 3b.

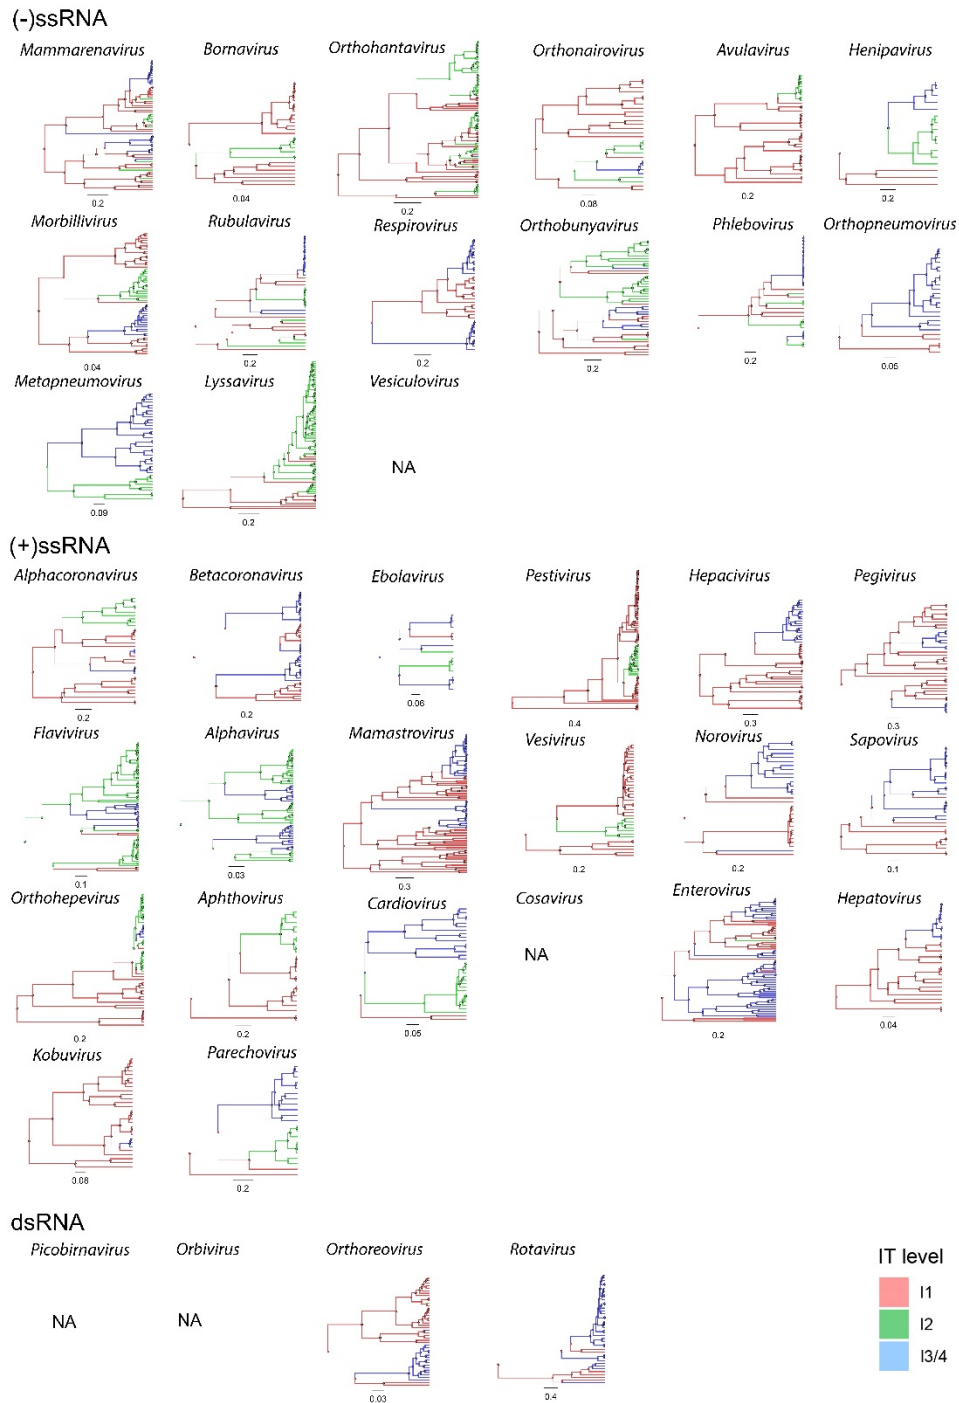

**Fig. S8.** Bayesian maximum clade credibility (MCC) trees for members of 35 virus genera using surface protein sequences (listed in Data File 8). Phylogenies show the most probable transitions between non-human viruses (red), viruses infective to humans (green) and viruses transmissible in human populations (blue). Phylogenies are arranged by genome type.

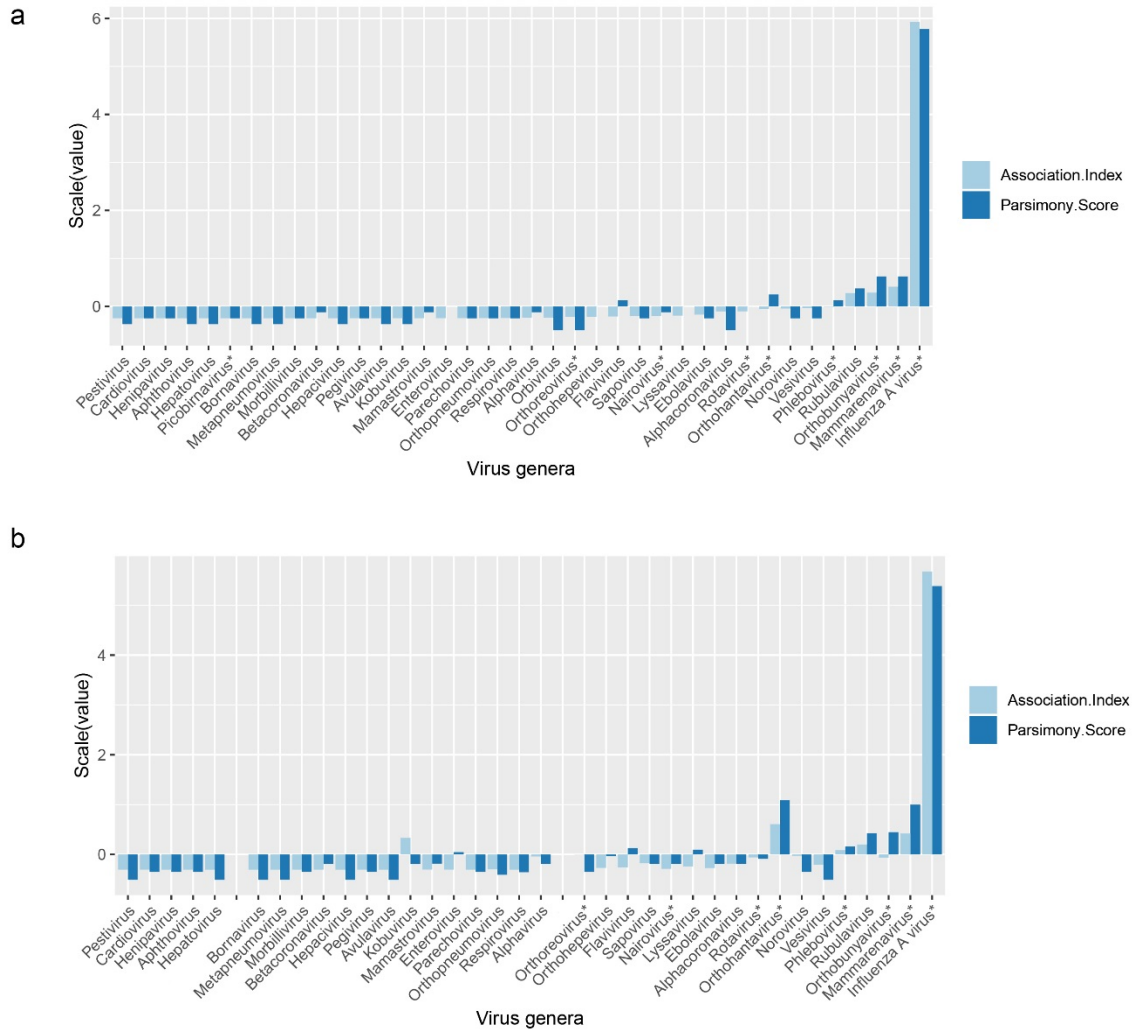

**Fig. S9.** Outputs of Phylogeny-trait association (BaTS) analysis as estimated IT level trait and phylogenies associations per genus. Scaled (i.e. normalised as  $(x - \text{mean})/\text{standard deviation}$ ) values of Association Index (AI) in light blue; scaled Parsimony Score (PS) in dark blue. Higher AI and PS indicate lower association between trait and phylogeny. **a**) RNA-dependent RNA polymerase proteins; and **b**) surface protein proteins. N= 38 and 36 respectively (see Data File 8). Genera with segmented genomes are indicated with asterisk.

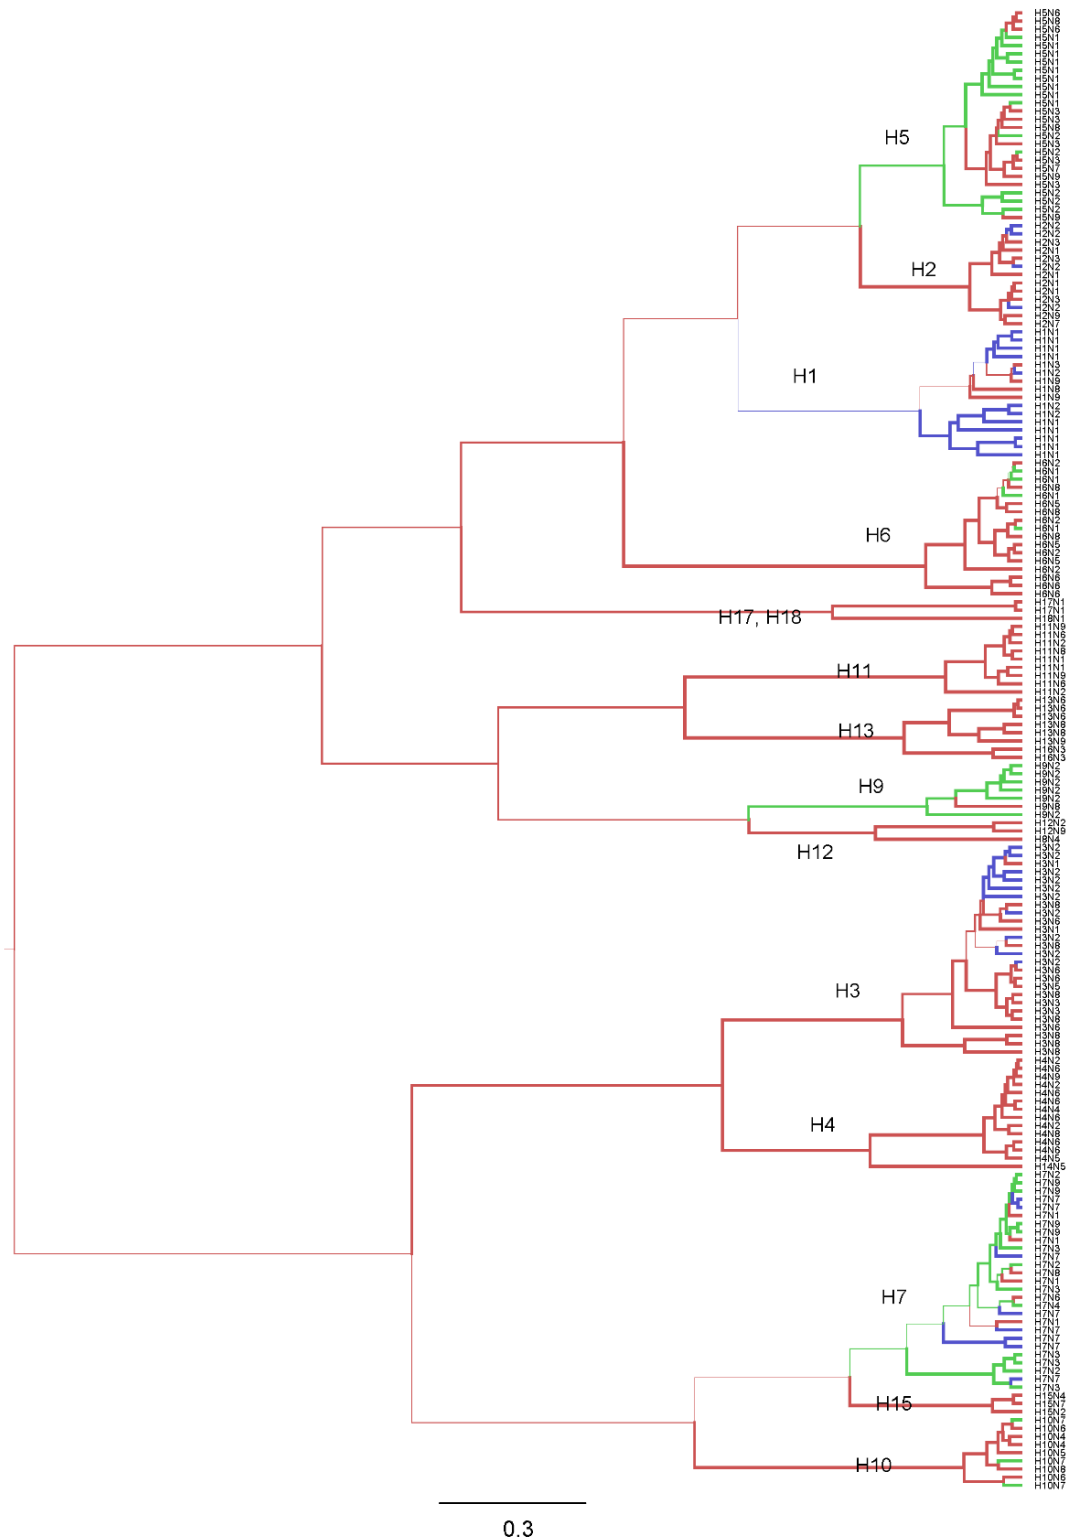

**Fig. S10.** Bayesian maximum clade credibility (MCC) trees for *Influenza A virus* genus. Phylogeny generated using full length hemagglutinin (HA) protein sequences (N=181, representing 67 subtypes), mapped with IT levels using discrete trait models with Markov jumps. Nine subtypes (H10N7, H5N1, H5N2, H6N1, H7N2, H7N3, H7N4, H7N9, H9N2) are IT level 2; 5 subtypes (H7N7, H1N1, H1N2, H2N2, H3N2) are L3/4; other subtypes are L1. Colour coding as Fig. 1. The scale bar represents amino acid substitutions per site.

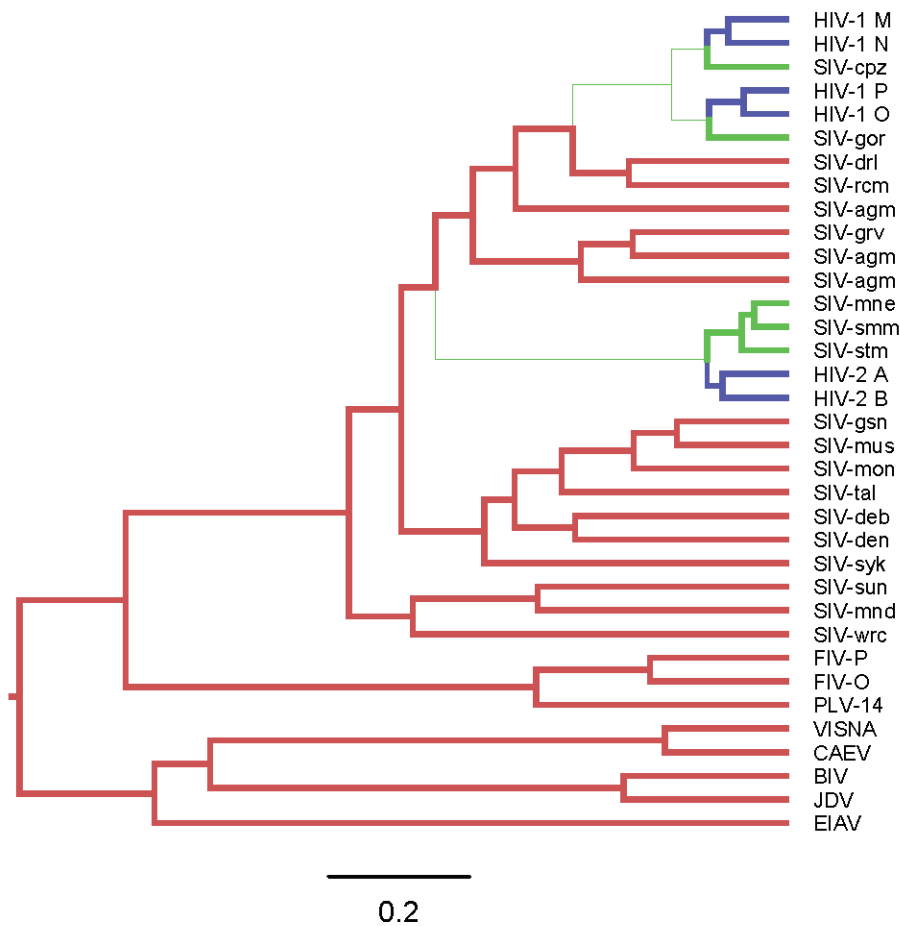

**Fig. S11.** Bayesian maximum clade credibility (MCC) trees for the *Lentivirus* genus. Phylogeny generated using *pol* protein sequences (N=35, representing 10 species), mapped with IT levels using discrete trait models with Markov jumps. HIV-1 (group O, P, N, M) and HIV-2 (group A and B) are IT level 3/4; SIV (in chimpanzees, gorillas and sooty mangabeys) are L2, other species are L1<sup>14</sup>. Colour coding as Fig. 1. The scale bar represents amino acid substitutions per site.

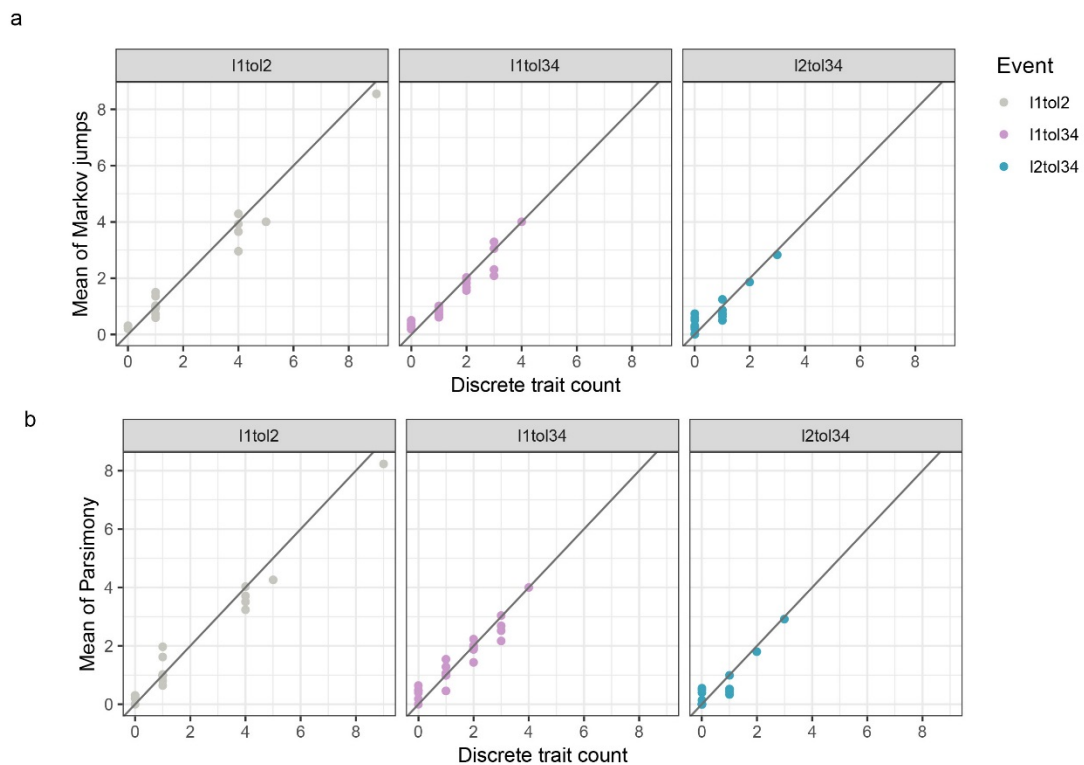

**Fig. S12.** Comparison of number of transitions (mean) in different genera (N=37) using different methods (see Table S1). Comparing **a**) discrete trait count versus number of transitions (mean) estimated by Markov jumps and **b**) observed node changes on discrete trait phylogenies (discrete trait count) versus number of transitions (mean) estimated by parsimony. Lines of equivalence are shown.

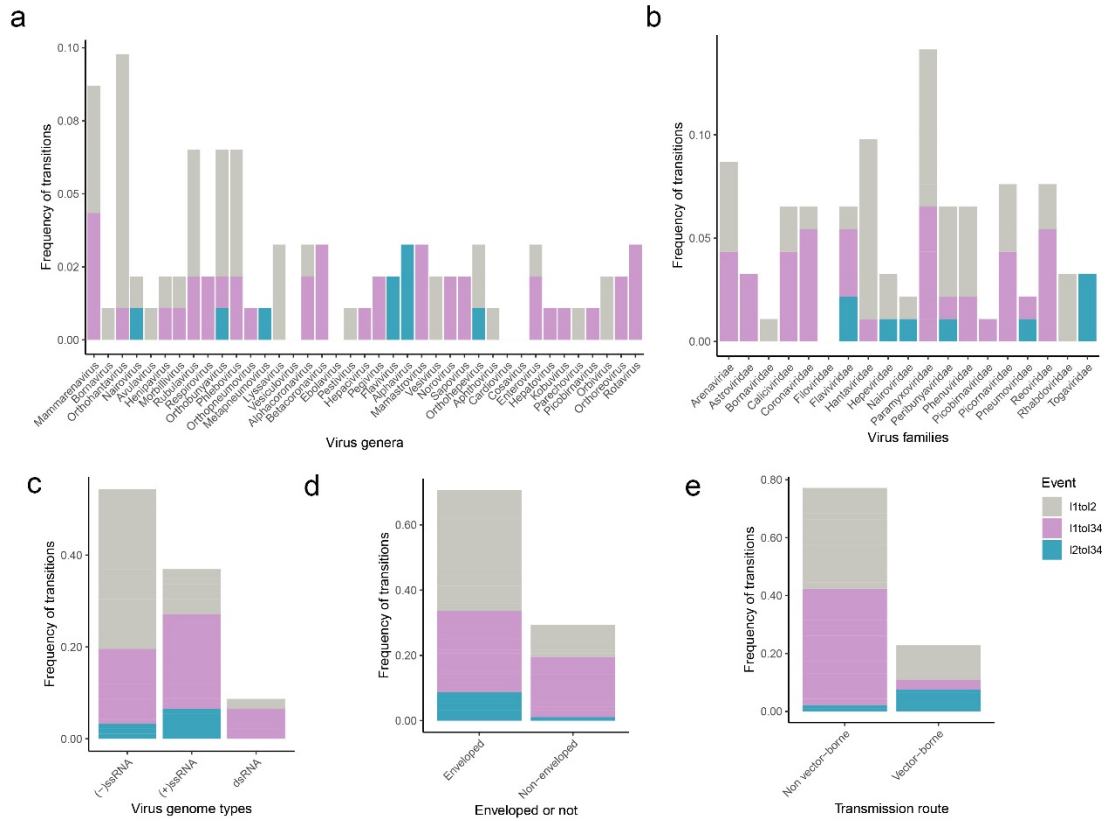

**Fig. S13.** As Fig. 2b-f respectively but based on the results of parsimony analysis.



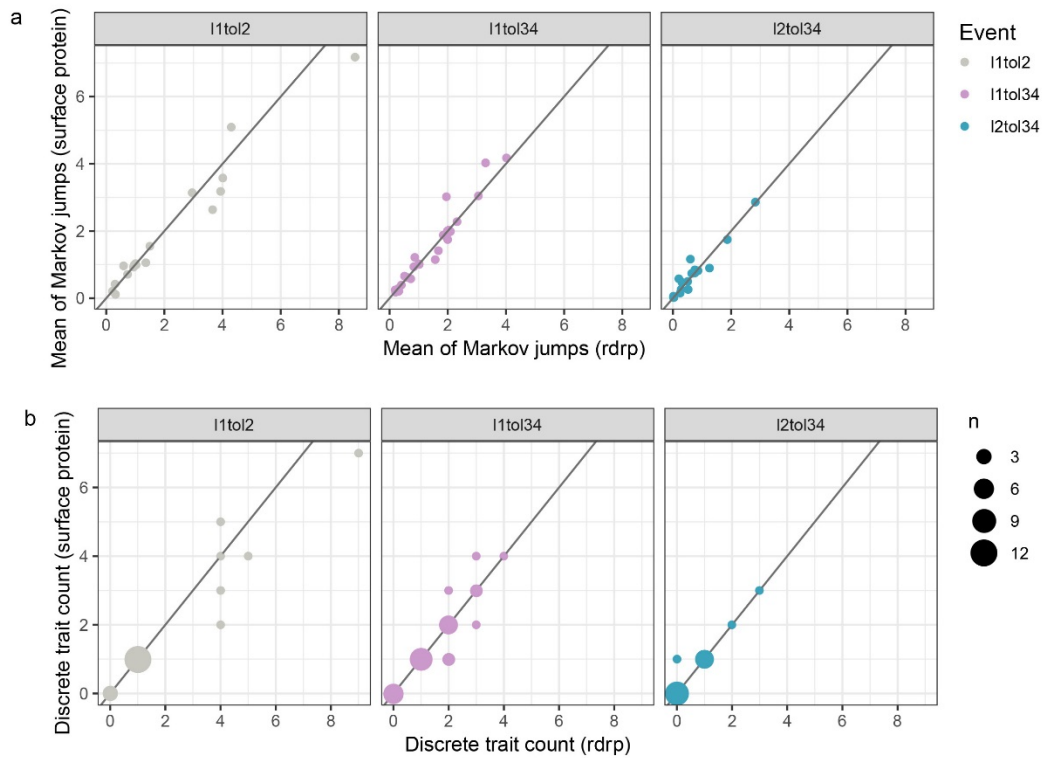

**Fig. S14.** Comparison of number of transitions in different genera (N=35) estimated using phylogenies based on polymerase (rdrp) vs surface protein genes. Graphs compare: **a**) number of transitions (mean) estimated by Markov jumps and **b**) observed node changes on discrete trait phylogenies (discrete trait count). Lines of equivalence are shown.

**Table S1.** Numbers of estimated transitions between human-infective/transmissible (IT) levels 1, 2 and 3/4 across all genera (N=39) compared for three methodologies: 1) counts of the number of internal node changes, transitions, observed from discrete traits analysis\* and 2) number of expected transitions (mean) from Markov jumps, both with input trees generated by Bayesian inference; 3) number of expected transitions (mean) from the parsimony reconstruction method with input trees generated using maximum likelihood methods.

| Transition | Counts | Markov jumps | Parsimony |
|------------|--------|--------------|-----------|
| L1 to L2   | 42     | 43           | 42        |
| L1 to L3/4 | 44     | 38           | 42        |
| L2 to L3/4 | 10     | 10           | 9         |

\*Transitions are identified as changes in the most probable IT level between adjacent nodes (see Fig. 1). Details of level transitions with posterior supports are given in Data Files 2 and 3.

**Table S2.** Variation in numbers of types of transitions – univariate analyses.

| <b>Variable</b> | <b>P value*</b> |
|-----------------|-----------------|
| Virus genus     | 0.002           |
| Virus family    | 0.002           |
| Genome type     | 0.001           |
| Enveloped       | 0.001           |
| Vector-borne    | <0.001          |

\*Results of two-sided Fisher's exact tests comparing numbers of L1-L2, L1-L3/4 and L2-L3/4 transitions among genera, families, genome types, enveloped/non-enveloped and vector-borne/non-vector-borne viruses with Holm-Bonferroni correction for multiple testing (see Figs 2b-f).

**Table S3.** Results of GLMM with beta distribution and genus as a random factor comparing relative node depth among transition types.

| <b>Variables</b> | <b>Coefficient*</b> | <b>Lower 95% confidence interval</b> | <b>Upper 95% confidence interval</b> | <b><math>X^2</math></b> | <b>df</b> | <b>P value</b> |
|------------------|---------------------|--------------------------------------|--------------------------------------|-------------------------|-----------|----------------|
| Level change     | -                   | -                                    | -                                    | 0.04                    | 2         | 0.98           |
| L1 to L3/4       | 0.02                | -0.41                                | 0.45                                 | -                       | -         | -              |
| L2 to L3/4       | 0.08                | -0.64                                | 0.79                                 | -                       | -         | -              |

\*Reporting results of Wald test and log-odds and 95% confidence intervals of global model. Reference category is L1 to L2 transitions. N=96.

**Table S4.** Predictors of  $\log_e$ -transformed genus-level relative transition rates distinguishing L1 to L2, L1 to L3/4 and L2 to L3/4 transitions.

| <b>Variables</b>        | <b>Coefficient*</b> | <b>Lower 95% confidence interval</b> | <b>Upper 95% confidence interval</b> | <b>X<sup>2</sup></b> | <b>df</b> | <b>P value</b> |
|-------------------------|---------------------|--------------------------------------|--------------------------------------|----------------------|-----------|----------------|
| Level change:           | -                   | -                                    | -                                    | 11.0                 | 2         | 0.004          |
| L1 to L3/4              | -0.11               | -0.27                                | 0.06                                 | -                    | -         | -              |
| L2 to L3/4              | -0.31               | -0.50                                | -0.13                                | -                    | -         | -              |
| Genome-enveloped:       | -                   | -                                    | -                                    | 0.30                 | 3         | 0.96           |
| (+ssRNA, Enveloped)     | -0.03               | -0.23                                | 0.17                                 | -                    | -         | -              |
| (+ssRNA, Non-enveloped) | -0.03               | -0.20                                | 0.14                                 | -                    | -         | -              |
| dsRNA                   | 0.04                | -0.26                                | 0.35                                 | -                    | -         | -              |
| Vector-borne            | -0.02               | -0.20                                | 0.17                                 | 0.03                 | 1         | 0.85           |

\*Outputs are from a LMM with a normal distribution, with genus as a random factor, showing coefficient estimates, 95% confidence intervals, and results of Wald tests comparing models including and excluding the fixed effect. Genome type and enveloped/non-enveloped are combined as a composite variable with four levels. Reference categories are L1 to L2 transitions, non-vector-borne and (-)ssRNA. N=67.

#### Data File 1

The ancestral level at the root of all genus trees. The posterior support of the ancestral node as well as the posterior probability of each discrete trait state (level) are listed.

#### Data File 2

Summary of forward transition events (L1-L2, L1-L3/4 and L2-L3/4) and relative node depth. The posterior support of the ancestral node as well as the posterior probability of each discrete trait state (level) are listed.

#### Data File 3

Summary of reverse transition events (L2-L1, L3/4-L1 and L3/4-L1) and relative node depth. The posterior support of the ancestral node as well as the posterior probability of each discrete trait state (level) are listed.

#### Data File 4

Sequence data used in this analysis. For each sequence being used in this study, the information of accession number, virus family, genus, species (whether ICTV recognized), transmission level and host type are given.

#### Data File 5

Maximum clade credibility (MCC) trees of 39 genera mapped with level traits (as shown in Fig. 1). The branches and nodes are coloured according to the most probable ancestral trait inferred by an asymmetric discrete trait model upon the posterior tree set, with correlated trait posterior probabilities indicated by branch widths. Virus species are labelled on tips of the trees. Trees are scaled by number of substitutions per site, with scale bars labelled underneath each genus tree.

#### Data File 6

Example XML file (*Mamastrovirus*) used in the discrete trait analysis.

#### Data File 7

Comparison of IT level trait reconstructions from discrete trait models and Parsimony methods.

#### Data File 8

Surface proteins selected for phylogenetic analysis by genus (N=35).

Data File 9

Comparison of number of L3/4 lineages and number of IT changes found in each genus phylogeny using polymerase and surface protein sequences.

## Supplementary references

- 1 Benson, D. A., Karsch-Mizrachi, I., Lipman, D. J., Ostell, J. & Wheeler, D. L. GenBank. *Nucleic Acids Res* **33**, D34-38, (2005).
- 2 Woolhouse, M. E. J., Brierley, L., McCaffery, C. & Lycett, S. Assessing the Epidemic Potential of RNA and DNA Viruses. *Emerg Infect Dis* **22**, 2037-2044, (2016).
- 3 Lefkowitz, E. J. *et al.* Virus taxonomy: the database of the International Committee on Taxonomy of Viruses (ICTV). *Nucleic Acids Res* **46**, D708-D717, (2018).
- 4 Drummond, A. J. & Rambaut, A. BEAST: Bayesian evolutionary analysis by sampling trees. *BMC Evol Biol* **7**, 214, (2007).
- 5 Simmonds, P., Aiewsakun, P. & Katzourakis, A. Prisoners of war - host adaptation and its constraints on virus evolution. *Nat Rev Microbiol*, (2018).
- 6 Edgar, R. C. MUSCLE: multiple sequence alignment with high accuracy and high throughput. *Nucleic Acids Res* **32**, 1792-1797, (2004).
- 7 Faria, N. R., Suchard, M. A., Rambaut, A., Streicker, D. G. & Lemey, P. Simultaneously reconstructing viral cross-species transmission history and identifying the underlying constraints. *Philos T R Soc B* **368**, 20120196, (2013).
- 8 Parker, J., Rambaut, A. & Pybus, O. G. Correlating viral phenotypes with phylogeny: accounting for phylogenetic uncertainty. *Infect Genet Evol* **8**, 239-246, (2008).
- 9 Baele, G. *et al.* Improving the Accuracy of Demographic and Molecular Clock Model Comparison While Accommodating Phylogenetic Uncertainty. *Molecular Biology and Evolution* **29**, 2157-2167, (2012).
- 10 Edwards, C. J. *et al.* Ancient hybridization and an Irish origin for the modern polar bear matriline. *Curr Biol* **21**, 1251-1258, (2011).
- 11 O'Brien, J. D., Minin, V. N. & Suchard, M. A. Learning to count: robust estimates for labeled distances between molecular sequences. *Mol Biol Evol* **26**, 801-814, (2009).
- 12 Stamatakis, A. RAxML version 8: a tool for phylogenetic analysis and post-analysis of large phylogenies. *Bioinformatics* **30**, 1312-1313, (2014).
- 13 Brooks, M. E. *et al.* glmmTMB Balances Speed and Flexibility Among Packages for Zero-inflated Generalized Linear Mixed Modeling. *R J* **9**, 378-400, (2017).
- 14 Sharp, P. M. & Hahn, B. H. Origins of HIV and the AIDS pandemic. *Cold Spring Harb Perspect Med* **1**, a006841, (2011).
